# 1 **Host-interactor screens of *Phytophthora infestans* RXLR proteins reveal** 2 **vesicle trafficking as a major effector-targeted process**

3  
4 Benjamin Petre<sup>1,2†</sup>, Mauricio P. Contreras<sup>1†</sup>, Tolga O. Bozkurt<sup>1,3</sup>, Martin H. Schattat<sup>1,4</sup>,  
5 Jan Sklenar<sup>1</sup>, Sebastian Schornack<sup>1,5</sup>, Ahmed Abd-El-Halim<sup>6</sup>, Roger Castells-  
6 Graells<sup>1,7</sup>, Rosa Lozano-Duran<sup>1,8</sup>, Yasin F. Dagdas<sup>1,9</sup>, Frank L. H. Menke<sup>1</sup>, Alexandra  
7 M. E. Jones<sup>1,10</sup>, Jack H. Vossen<sup>11</sup>, Silke Robatzek<sup>1,12</sup>, Sophien Kamoun<sup>1\*</sup>, Joe Win<sup>1\*</sup>

8  
9 <sup>1</sup> The Sainsbury Laboratory, University of East Anglia, Norwich Research Park, Norwich, United  
10 Kingdom.

11 <sup>2</sup> Université de Lorraine, INRAE, IAM, Nancy, France.

12 <sup>3</sup> Department of Life Sciences, Imperial College London, London, United Kingdom.

13 <sup>4</sup> Department of Plant Physiology, Institute for Biology, Martin-Luther University Halle-Wittenberg,  
14 Halle Germany.

15 <sup>5</sup> Sainsbury Laboratory, University of Cambridge, Cambridge, United Kingdom.

16 <sup>6</sup> Plant Physiology, University of Amsterdam, Swammerdam Institute for Life Sciences  
17 Amsterdam, Amsterdam, The Netherlands.

18 <sup>7</sup> Department of Biological Chemistry, John Innes Centre, Norwich Research Park, Norwich,  
19 United Kingdom.

20 <sup>8</sup> Shanghai Center for Plant Stress Biology, CAS Center for Excellence in Molecular Plant  
21 Sciences, Chinese Academy of Sciences, Shanghai, China.

22 <sup>9</sup> Gregor Mendel Institute, Austrian Academy of Sciences, Vienna BioCenter, Vienna, Austria.

23 <sup>10</sup> School of Life Sciences, University of Warwick, Coventry, United Kingdom.

24 <sup>11</sup> Plant Breeding, Wageningen University and Research, Wageningen, The Netherlands.

25 <sup>12</sup> Ludwig-Maximilian-University of Munich, Munich, Germany.

26 † These authors contributed equally to this work.

27 \* To whom correspondence should be addressed.

28

29

## 30 **ABSTRACT**

31

32 Pathogens modulate plant cell structure and function by secreting effectors into host  
33 tissues. Effectors typically function by associating with host molecules and modulating  
34 their activities. This study aimed to identify the host processes targeted by the RXLR  
35 class of host-translocated effectors of the potato blight pathogen *Phytophthora*  
36 *infestans*. To this end, we performed an *in planta* protein-protein interaction screen by  
37 transiently expressing *P. infestans* RXLR effectors in *Nicotiana benthamiana* leaves  
38 followed by co-immunoprecipitation (co-IP) and liquid chromatography tandem mass  
39 spectrometry (LC-MS/MS). This screen generated an effector-host protein  
40 interactome matrix of 59 *P. infestans* RXLR effectors x 586 *N. benthamiana* proteins.  
41 Classification of the host interactors into putative functional categories revealed over  
42 35 biological processes possibly targeted by *P. infestans*. We further characterized  
43 the PexRD12/31 family of RXLR-WY effectors, which associate and co-localize with  
44 components of the vesicle trafficking machinery. One member of this family, PexRD31,  
45 increased the number of FYVE positive vesicles in *N. benthamiana* cells. FYVE

46 positive vesicles also accumulated in leaf cells near *P. infestans* hyphae, indicating  
47 that the pathogen may enhance endosomal trafficking during infection. We anticipate  
48 that the interactome dataset we generated will serve as a useful community resource  
49 for functional studies of *P. infestans* effectors and of effector-targeted host processes.

50

## 51 INTRODUCTION

52

53 Plant pathogens reprogram host cells to their advantage to establish successful  
54 infections (Dodds and Rathjen, 2010). Understanding how pathogens manipulate their  
55 hosts will advance our knowledge of infection processes and help us develop disease  
56 resistant crops (Alfano, 2009; Gawehns *et al.*, 2013; van Schie and Takken, 2014).  
57 Pathogens modulate plant cell structure and function by secreting effectors into host  
58 tissues. Effectors generally operate by binding or enzymatically modifying host  
59 molecules. These host molecules are classified in two major functional classes: (i)  
60 'targets' directly modified by effectors to modulate host processes; (ii) 'helpers' or  
61 'facilitators' co-opted by effectors to execute their activities, for instance to traffic within  
62 host cells (Win *et al.*, 2012b). Some effectors can be recognized by host immune  
63 receptors, consequently triggering an immune response. Such effectors are said to  
64 have an avirulence (AVR) activity, as their recognition often results in loss of virulence  
65 of the pathogen in hosts carrying a matching immune receptor (Dodds and Rathjen,  
66 2010). Despite major advances in effector biology, our understanding of effector-  
67 targeted processes remains fragmentary and generally centered on suppression of  
68 innate immunity (Zheng *et al.*, 2014; Sharpee and Dean, 2016; Toruño *et al.*, 2016;  
69 Ren *et al.*, 2019).

70

71 Effectors modulate a variety of pathways and therefore can be leveraged as molecular  
72 probes to reveal novel and important processes in host cells (Wei *et al.*, 2012; Win *et al.*,  
73 2012b; Lee *et al.*, 2013; Toruño *et al.*, 2016). Pathogen effectors generally  
74 associate with host protein complexes to function (Asai and Shirasu, 2015; Boevink *et al.*,  
75 2016). Identifying these host proteins is the first step in unravelling the host  
76 processes modulated by effectors. To this end, over the last decade effector biologists  
77 have performed large-scale effector-host protein interaction screens using yeast two-  
78 hybrid or *in planta* coimmunoprecipitation/tandem mass spectrometry (coIP/MS)  
79 assays (Mukhtar *et al.*, 2011; Weßling *et al.*, 2014; Petre *et al.*, 2015; Petre *et al.*,  
80 2016). While yeast-two hybrid identifies one-to-one protein associations, coIP/MS  
81 assays tend to reveal multiple host proteins that associate with a given effector in  
82 protein complexes (Win *et al.*, 2011; Petre *et al.*, 2017). This feature makes coIP/MS  
83 assays particularly suitable for identifying processes targeted by effectors. Moreover,  
84 the increasing availability of plant genome sequences allows for improved proteome  
85 predictions that greatly aid IP/MS based effector interactor searches.

86

87 The Irish potato famine pathogen *Phytophthora infestans* (oomycete, Peronosporales)  
88 is a major threat to potato and tomato crops worldwide (Fisher *et al.*, 2012; Kamoun  
89 *et al.*, 2015; Derevnina *et al.*, 2016). Peronosporales species secrete a superfamily of  
90 effector proteins known as RXLR effectors; named after the conserved Arginine-any  
91 amino acid-Leucine-Arginine motif that follows the signal peptide of the proteins (Jiang  
92 *et al.*, 2008; Win *et al.*, 2012a). The *P. infestans* genome harbors over 500 predicted  
93 RXLR effectors that are grouped into ~150 families and tend to exhibit sequence and  
94 expression polymorphisms between pathogen strains (Haas *et al.*, 2009; Cooke *et al.*,  
95 2012; Yoshida *et al.*, 2013; Pais *et al.*, 2018). RXLR effectors are modular proteins  
96 with the N-terminal signal peptide and RXLR region mediating secretion and  
97 translocation into host cells, and the C-terminal end, often defined by the WY/LWY  
98 fold, carrying the effector biochemical activity (Whisson *et al.*, 2007; Win *et al.*, 2012a;  
99 He *et al.*, 2019). To date, over a dozen *P. infestans* RXLR effectors have been  
100 functionally characterized for their virulence activities (Rovenich *et al.*, 2014; Anderson  
101 *et al.*, 2015; Du *et al.*, 2015; Wang *et al.*, 2015; Boevink *et al.*, 2016; Dagdas *et al.*,  
102 2016; Yang *et al.*, 2016; Turnbull *et al.*, 2017; Wang *et al.*, 2018). These effectors bind  
103 and alter the stability, activity, or subcellular localization of a diversity of host proteins,  
104 including proteases, kinases, phosphatases, transcription factors, ubiquitin ligases,  
105 RNA binding proteins, autophagy-related proteins, and vesicular trafficking-associated  
106 proteins. The emerging picture is that *P. infestans* RXLR effectors modulate multiple  
107 host processes to the pathogen's benefit. Nonetheless, systematic interactome  
108 screens between *P. infestans* RXLR effectors and host proteins have not been  
109 reported to date.

110  
111 Many plant pathogenic and symbiotic microbes produce specialized hyphae that  
112 invade host cells but remain enveloped by newly synthesized host-derived  
113 membranes (Oliveira-Garcia and Valent, 2015; Ivanov *et al.*, 2019; Bozkurt and  
114 Kamoun, 2020). Processes taking place at this host-pathogen interface are thought to  
115 have a major impact on the outcome of the interaction. The mechanisms underlying  
116 the biogenesis and functions of host-microbe interfaces remain poorly understood  
117 although recent advances have been made (Bozkurt and Kamoun, 2020; Rausche *et al.*,  
118 2020). Well-studied examples of these specialized hyphae are haustoria formed  
119 by *P. infestans* and other filamentous pathogens. During infection, haustoria enter the  
120 plant cell cavity and become surrounded by the plant-derived extrahaustorial  
121 membrane (EHM). *P. infestans* effectors secreted at this pathogen-host interface are  
122 thought to reprogram multiple processes in the invaded (haustoriated) host cells  
123 (Bozkurt *et al.*, 2012; Dagdas *et al.*, 2016; Dagdas *et al.*, 2018). In addition, four *P.*  
124 *infestans* RXLR effectors, AVRblb2, AVR1, AVR2, and PexRD54, focally accumulate  
125 around haustoria when they are heterologously expressed in host cells (Bozkurt *et al.*,  
126 2011; Saunders *et al.*, 2012; Dagdas *et al.*, 2018; Wang *et al.*, 2018). These findings,  
127 along with related cell biology and biochemical studies, indicate that *P. infestans*  
128 massively reprograms host membrane trafficking during infection (Du *et al.*, 2015;  
129 Tomczynska *et al.*, 2018). Membrane trafficking perturbations of haustoriated cells  
130 include the rerouting to the haustorial interface of components of the endocytic

131 pathways (Lu *et al.*, 2012; Bozkurt *et al.*, 2015), autophagy machinery (Dagdas *et al.*,  
132 2018; Pandey *et al.*, 2020) and chloroplasts (Toufexi *et al.*, 2019).

133

134 This study aims at identifying the host plant proteins that are associated with a  
135 representative set of *P. infestans* RXLR effectors to generate a pathogen-host protein  
136 interactome and gain an overview of the diversity of effector-targeted processes in this  
137 pathosystem. To achieve our aim, we performed an *in planta* coIP/MS screen in the  
138 model plant *Nicotiana benthamiana*, which has emerged as an optimal experimental  
139 system for cell biology and biochemistry studies of *P. infestans*-host interactions  
140 (Bozkurt and Kamoun 2020). In addition, *N. benthamiana* is particularly appropriate  
141 for large-scale coIP/MS screens thanks to rapid transient protein expression using  
142 *Agrobacterium tumefaciens* (agroinfiltration) and the availability of a genome  
143 sequence that improves MS proteome predictions (Goodin *et al.*, 2008; Derevnina *et*  
144 *al.*, 2019; Zess *et al.*, 2019). Using this approach, we generated a host protein-  
145 pathogen effector interactome matrix of 59 *P. infestans* RXLR effectors x 586 *N.*  
146 *benthamiana* proteins. This interactome revealed 35 candidate effector-targeted  
147 processes in *N. benthamiana*. We further characterized the PexRD12/31 family of  
148 RXLR-WY effectors, which associate and co-localize with components of the vesicle  
149 trafficking machinery. One member of this family, PexRD31, increased the number of  
150 2xFYVE-GFP labelled vesicles in *N. benthamiana* cells. We also noted that *P.*  
151 *infestans* alters the number and the distribution of 2xFYVE-GFP vesicles in *N.*  
152 *benthamiana* leaves, indicating that the pathogen dramatically alters host endosomal  
153 trafficking during infection.

154

## 155 RESULTS

### 156 ***In planta* coimmunoprecipitation/mass spectrometry (coIP/MS) assays reveal** 157 **host proteins associated with *Phytophthora infestans* RXLR effectors**

158

159 To identify host protein complexes associated with representative *P. infestans* RXLR  
160 effectors, we performed a protein-protein interaction screen *in planta* using a pipeline  
161 similar to the one we previously described for candidate effector proteins of the poplar  
162 leaf rust fungus (Petre *et al.*, 2015). We first selected 66 effectors from 14 prominent  
163 RXLR families, which are enriched in effectors that are transcriptionally induced during  
164 plant infection and carrying AVR activities (Table 1) (Oh *et al.*, 2009; Vleeshouwers *et*  
165 *al.*, 2011). We then expressed N-terminal FLAG-tagged effector proteins individually  
166 in *N. benthamiana* leaf cells by agroinfiltration and performed anti-FLAG coIP/MS to  
167 identify host protein complexes associated with each effector (Figure S1, see methods  
168 for details). We evaluated the expression of the effector fusions by analyzing  
169 immunoprecipitated protein mixtures using sodium dodecyl sulphate-polyacrylamide  
170 gel electrophoresis (SDS-PAGE) coupled with Colloidal Coomassie Blue (CCB)  
171 staining (Figure S2). Out of 66 effectors, 59 accumulated to adequate levels for coIP  
172 and identification by mass spectrometry. Spectral searches against the *N.*

173 *benthamiana* proteome revealed 967 host protein interactors for the 59 effectors  
 174 (Dataset 1).

175

176 **Table 1. *Phytophthora infestans* RXLR effectors used in co-immunoprecipitation study**

177

| Effector     | GenBank<br>Accession | Family <sup>1</sup> | Size<br>(full<br>length) | Insert<br>peptide | WY<br>fold <sup>2</sup> | Cell<br>death <sup>3</sup> | MS<br>Data <sup>4</sup> | Whole lane<br>(or) bands <sup>5</sup> | Reference                            |
|--------------|----------------------|---------------------|--------------------------|-------------------|-------------------------|----------------------------|-------------------------|---------------------------------------|--------------------------------------|
| AVR2         | QBB68791             | AVR2                | 116                      | 66-116            | 0                       | No                         | No                      | N.D.                                  | Gilroy <i>et al.</i> , 2011          |
| PexRD11      | ACX46536             | AVR2                | 114                      | 22-114            | 0                       | No                         | Yes                     | Whole lane                            | Oh <i>et al.</i> , 2009              |
| PexRD11sh    | ACX46536             | AVR2                | 114                      | 64-114            | 0                       | No                         | Yes                     | Whole lane                            | Oh <i>et al.</i> , 2009              |
| PITG_05121   | XP_002998822         | AVR2                | 114                      | 67-114            | 0                       | No                         | No                      | N.D.                                  | Haas <i>et al.</i> , 2009            |
| PITG_06077   | XP_002998270         | AVR2                | 118                      | 67-118            | 0                       | No                         | No                      | N.D.                                  | Haas <i>et al.</i> , 2009            |
| PITG_07500   | XP_002904502         | AVR2                | 118                      | 66-118            | 0                       | Yes                        | Yes                     | Whole lane                            | Haas <i>et al.</i> , 2009            |
| PITG_08278   | XP_002903684         | AVR2                | 118                      | 66-118            | 0                       | No                         | Yes                     | Whole lane                            | Haas <i>et al.</i> , 2009            |
| PITG_13936   | XP_002899599         | AVR2                | 96                       | 64-96             | 0                       | No                         | Yes                     | Whole lane                            | Haas <i>et al.</i> , 2009            |
| PITG_13940   | XP_002899603         | AVR2                | 114                      | 64-114            | 0                       | No                         | Yes                     | Whole lane                            | Haas <i>et al.</i> , 2009            |
| PITG_15972   | XP_002898185         | AVR2                | 94                       | 66-94             | 0                       | No                         | Yes                     | Whole lane                            | Haas <i>et al.</i> , 2009            |
| PITG_19617   | XP_002996938         | AVR2                | 118                      | 66-118            | 0                       | No                         | No                      | N.D.                                  | Haas <i>et al.</i> , 2009            |
| PITG_21949   | XP_002996876         | AVR2                | 114                      | 64-114            | 0                       | No                         | Yes                     | Whole lane                            | Haas <i>et al.</i> , 2009            |
| PITG_22975   | XP_002899618         | AVR2                | 114                      | 64-114            | 0                       | No                         | Yes                     | Whole lane                            | Haas <i>et al.</i> , 2009            |
| AVR3a        | E2DWQ7               | AVR3a               | 147                      | 22-147            | 1                       | No                         | Yes                     | Whole lane                            | Amstrong <i>et al.</i> , 2005        |
| Pex147-2     | XP_002898841         | AVR3a               | 148                      | 22-148            | 1                       | No                         | No                      | N.D.                                  | Amstrong <i>et al.</i> , 2005        |
| Pex147-3     | XP_002898843         | AVR3a               | 147                      | 22-147            | 1                       | No                         | Yes                     | Bands                                 | Amstrong <i>et al.</i> , 2005        |
| AVR4         | XP_002904419         | AVR4                | 287                      | 22-287            | 4                       | No                         | Yes                     | Bands                                 | Van Poppel <i>et al.</i> , 2008      |
| AVRblb1      | XP_002895051         | AVRblb1             | 152                      | 22-152            | 0                       | Yes                        | Yes                     | Whole lane                            | Vleeshouwers <i>et al.</i> ,<br>2008 |
| PexRD39      | ACX46588             | AVRblb2             | 92                       | 15-92             | 0                       | No                         | No                      | N.D.                                  | Oh <i>et al.</i> , 2009              |
| PexRD39sh    | ACX46588             | AVRblb2             | 92                       | 39-92             | 0                       | No                         | Yes                     | Whole lane                            | Oh <i>et al.</i> , 2009              |
| PexRD40      | ACX46596             | AVRblb2             | 92                       | 15-92             | 0                       | No                         | Yes                     | Whole lane                            | Oh <i>et al.</i> , 2009              |
| PexRD40_34aa | ACX46596             | AVRblb2             | 92                       | 59-92             | 0                       | No                         | No                      | N.D.                                  | Oh <i>et al.</i> , 2009              |
| PexRD40sh    | ACX46596             | AVRblb2             | 92                       | 39-92             | 0                       | No                         | No                      | N.D.                                  | Oh <i>et al.</i> , 2009              |
| PexRD41      | ACX46573             | AVRblb2             | 84                       | 22-105            | 0                       | No                         | Yes                     | Bands                                 | Oh <i>et al.</i> , 2009              |
| PexRD45      | ACX46578             | AVRblb2             | 90                       | 19-106            | 0                       | No                         | No                      | N.D.                                  | Oh <i>et al.</i> , 2009              |
| PexRD46      | ACX46579             | AVRblb2             | 84                       | 22-105            | 0                       | No                         | No                      | N.D.                                  | Oh <i>et al.</i> , 2009              |
| PITG_04086   | XP_002905796         | AVRblb2             | 100                      | 47-100            | 0                       | No                         | Yes                     | Whole lane                            | Haas <i>et al.</i> , 2009            |
| PITG_04097   | XP_002905808         | AVRblb2             | 107                      | 44-107            | 0                       | No                         | Yes                     | Whole lane                            | Haas <i>et al.</i> , 2009            |
| PITG_04194   | XP_002905878         | AVRblb2             | 107                      | 44-107            | 0                       | No                         | Yes                     | Whole lane                            | Haas <i>et al.</i> , 2009            |
| PITG_18675   | XP_002997305         | AVRblb2             | 107                      | 44-107            | 0                       | No                         | Yes                     | Whole lane                            | Haas <i>et al.</i> , 2009            |
| PITG_18683   | XP_002997312         | AVRblb2             | 100                      | 47-100            | 0                       | No                         | Yes                     | Whole lane                            | Haas <i>et al.</i> , 2009            |
| PITG_20300   | XP_002895918         | AVRblb2             | 100                      | 47-100            | 0                       | No                         | No                      | N.D.                                  | Haas <i>et al.</i> , 2009            |
| PITG_20301   | XP_002895919         | AVRblb2             | 100                      | 47-100            | 0                       | No                         | No                      | N.D.                                  | Haas <i>et al.</i> , 2009            |
| PITG_20303   | XP_002895919         | AVRblb2             | 100                      | 47-100            | 0                       | No                         | Yes                     | Whole lane                            | Haas <i>et al.</i> , 2009            |
| PITG_07689   | XP_002904634         | AVRpur              | 104                      | 27-104            | 0                       | No                         | Yes                     | Whole lane                            | Haas <i>et al.</i> , 2009            |
| PITG_07689   | XP_002904634         | AVRpur              | 104                      | 27-104            | 0                       | No                         | Yes                     | Whole lane                            | Haas <i>et al.</i> , 2009            |
| PITG_16275   | XP_002897665         | AVRpur              | 170                      | 25-170            | 0                       | No                         | Yes                     | Whole lane                            | Haas <i>et al.</i> , 2009            |
| PITG_16294   | XP_002897362         | AVRvnt1             | 153                      | 24-153            | 0                       | No                         | No                      | N.D.                                  | Haas <i>et al.</i> , 2009            |
| PITG_18880   | XP_002997157         | AVRvnt1             | 154                      | 23-154            | 0                       | No                         | Yes                     | Whole lane                            | Haas <i>et al.</i> , 2009            |
| PITG_18880-4 | XP_002997157         | AVRvnt1             | 154                      | 23-154            | 0                       | No                         | Yes                     | Whole lane                            | Haas <i>et al.</i> , 2009            |
| NUK10        | XP_002898730         | PexRD1              | 213                      | 20-213            | 2                       | No                         | No                      | Single band                           | Haas <i>et al.</i> , 2009            |
| NUK10-NLS    | XP_002898730         | PexRD1              | 213                      | 20-213            | 2                       | No                         | No                      | Single band                           | Haas <i>et al.</i> , 2009            |
| PexRD2       | XP_002894954         | PexRD2              | 121                      | 21-121            | 1                       | Yes                        | Yes                     | Whole lane                            | Oh <i>et al.</i> , 2009              |
| PITG_14787   | XP_002898994         | PexRD2              | 130                      | 57-130            | 2                       | No                         | No                      | N.D.                                  | Haas <i>et al.</i> , 2009            |
| PexRD3       | ACX46525             | PexRD3              | 168                      | 25-168            | 2                       | No                         | Yes                     | Whole lane                            | Oh <i>et al.</i> , 2009              |
| PexRD6       | AAA21423             | PexRD6              | 152                      | 22-152            | 1                       | Yes                        | No                      | N.D.                                  | Oh <i>et al.</i> , 2009              |
| PexRD8       | XP_002898614         | PexRD8              | 142                      | 23-142            | 0                       | No                         | No                      | N.D.                                  | Oh <i>et al.</i> , 2009              |
| PexRD12      | XP_002897644         | PexRD12/31          | 115                      | 62-115            | 1                       | Yes <sup>6</sup>           | No                      | N.D.                                  | Haas <i>et al.</i> , 2009            |
| (PITG_16245) |                      |                     |                          |                   |                         |                            |                         |                                       |                                      |
| PexRD31      | XP_002897462         | PexRD12/31          | 119                      | 66-119            | 1                       | Yes                        | Yes                     | Whole lane                            | Oh <i>et al.</i> , 2009              |
| (PITG_23074) |                      |                     |                          |                   |                         |                            |                         |                                       |                                      |
| PITG_16233   | XP_002897640         | PexRD12/31          | 123                      | 71-123            | 1                       | No                         | Yes                     | Whole lane                            | Haas <i>et al.</i> , 2009            |
| PITG_16235   | XP_002897637         | PexRD12/31          | 129                      | 77-129            | 1                       | No                         | Yes                     | Whole lane                            | Haas <i>et al.</i> , 2009            |

178 **Table 1. *Phytophthora infestans* RXLR effectors used in co-immunoprecipitation study**  
 179 (Continued)

180

| Effector    | GenBank Accession | Family <sup>1</sup> | Size (full length) | Insert peptide | WY fold <sup>2</sup> | Cell death <sup>3</sup> | MS Data <sup>4</sup> | Whole lane (or) bands <sup>5</sup> | Reference                 |
|-------------|-------------------|---------------------|--------------------|----------------|----------------------|-------------------------|----------------------|------------------------------------|---------------------------|
| PITG_16242  | XP_002897642      | PexRD12/31          | 129                | 23-129         | 1                    | No                      | Yes                  | Whole lane                         | Haas <i>et al.</i> , 2009 |
| PITG_16243  | XP_002897643      | PexRD12/31          | 119                | 66-119         | 1                    | Yes                     | Yes                  | Whole lane                         | Haas <i>et al.</i> , 2009 |
| PITG_16248  | XP_002897647      | PexRD12/31          | 119                | 66-119         | 1                    | Yes                     | No                   | N.D.                               | Haas <i>et al.</i> , 2009 |
| PITG_16409  | XP_002897637      | PexRD12/31          | 129                | 77-129         | 1                    | No                      | Yes                  | Whole lane                         | Haas <i>et al.</i> , 2009 |
| PITG_16428  | XP_002897468      | PexRD12/31          | 142                | 75-142         | 1                    | Yes                     | Yes                  | Whole lane                         | Haas <i>et al.</i> , 2009 |
| PITG_20336  | XP_002897640      | PexRD12/31          | 123                | 71-123         | 0                    | No                      | Yes                  | Whole lane                         | Haas <i>et al.</i> , 2009 |
| PITG_23069  | XP_002897638      | PexRD12/31          | 119                | 66-119         | 1                    | Yes                     | Yes                  | Whole lane                         | Haas <i>et al.</i> , 2009 |
| PITG_05911  | XP_002998153      | PexRD18             | 135                | 67-135         | 1                    | No                      | Yes                  | Whole lane                         | Haas <i>et al.</i> , 2009 |
| PITG_05912  | XP_002998154      | PexRD18             | 135                | 67-135         | 1                    | No                      | Yes                  | Whole lane                         | Haas <i>et al.</i> , 2009 |
| PITG_05918  | XP_002998156      | PexRD18             | 135                | 67-135         | 1                    | No                      | Yes                  | Whole lane                         | Haas <i>et al.</i> , 2009 |
| PITG_22089  | XP_002894699      | PexRD18             | 135                | 67-135         | 1                    | No                      | Yes                  | Whole lane                         | Haas <i>et al.</i> , 2009 |
| 35a12_90128 | N/A               | PexRD35a12          | 143                | 67-143         | 1                    | No                      | Yes                  | Whole lane                         | This study                |
| 35a12_Cu10  | N/A               | PexRD35a12          | 143                | 67-143         | 1                    | No                      | Yes                  | Whole lane                         | This study                |
| PexRD36     | ACX46558          | PexRD36             | 106                | 23-106         | 1                    | Yes                     | Yes                  | Bands                              | Oh <i>et al.</i> , 2009   |
| PexRD54     | XP_002903599      | PexRD54             | 381                | 76-381         | 5                    | Yes                     | Yes                  | Whole lane                         | Oh <i>et al.</i> , 2009   |

181  
182  
183  
184  
185  
186  
187

<sup>1</sup>Family clustering was based on Haas *et al.* (2009).

<sup>2</sup>Presence of WY domain was predicted using HMMER 3.2.1 software and the WY-fold Hidden Markov model reported in Boutemy *et al.* (2011)

<sup>3</sup>Cell death observed three days post infiltration.

<sup>4</sup>Mass spectrometry (MS) data successfully collected.

<sup>5</sup>Whole lane = whole lane of protein gel was cut into gel slices and all slices were submitted for MS; Bands = each visible Coomassie stained protein bands on the gel for each effector were cut and submitted for MS; N.D. = No band was present, and no data could be collected.

<sup>6</sup>Cell death observed only when N-terminally tagged with GFP and mCherry fluorescent proteins.

188

189 Next, we deconvoluted the 59 x 967 matrix to facilitate the interpretation of the results.  
 190 Firstly, given that multiple RXLR effectors are related and analyses of individual  
 191 effectors would skew the results towards the largest families, we merged the data for  
 192 the 59 individual effectors into 14 sequence-related families (Dataset 2). In total, 7  
 193 effectors remained as singletons whereas the others grouped into families that range  
 194 in size from 2 to 16 (AVRblb2 being the largest family) (Table 1). Secondly, to further  
 195 reduce the matrix complexity, we clustered host protein into groups having at least  
 196 80% identity over at least 80% of length. This yielded a total of 586 host proteins,  
 197 which were represented by a single protein entry to make a consolidated interactome  
 198 matrix (Dataset 2). We used this interactome network for further analyses. On  
 199 average, a given effector family associated with 105 host proteins (range 5 to 348),  
 200 with the PexRD12/31 family associating with the largest number of proteins (Figure  
 201 1A). *N. benthamiana* interactor proteins associated in average with 2.5 effector  
 202 families (Figure 1B).

203

## 204 ***Phytophthora infestans* RXLR effector families associate with host protein** 205 **complexes that include previously validated interactors**

206

207 One limitation of affinity purification-mass spectrometry assays is that they tend to  
 208 yield false positives, notably abundant and sticky proteins (Mellacheruvu *et al.*, 2013;  
 209 Petre *et al.*, 2015). Given that the same false positives tend to appear in independent  
 210 experiments, interactors that are specific to a smaller subset of bait proteins are more  
 211 likely to be biologically relevant. We therefore flagged the most promiscuous

212 interactors that associated with >9 effector families as likely representing false  
 213 positives (Figure 1C). These 16 “usual suspect” interactors overlap with the list  
 214 previously reported by Petre *et al.* (2015) for *N. benthamiana* interactors of candidate  
 215 effectors from the poplar rust fungus.  
 216

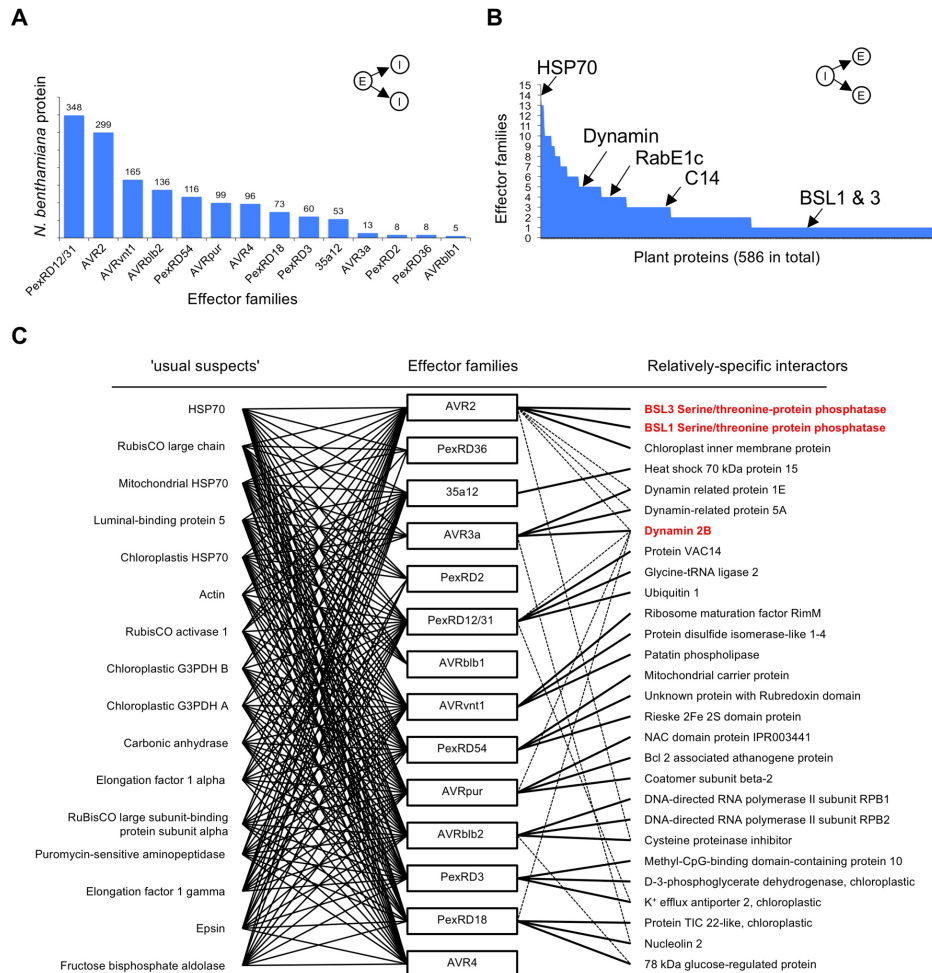

217

218

219 **Figure 1.** Overview of the *Phytophthora infestans* RXLR effector x *Nicotiana benthamiana* protein  
 220 interactome.

221 **(A)** Number of plant proteins that associate with each of the tested 14 RXLR effector families of *P.*  
 222 *infestans*. E = effector family; I = host interactor. **(B)** Number of effector families that associate with  
 223 each *N. benthamiana* protein. For example, HSP70 associated with all 14 effector families while  
 224 previously experimentally validated interactors BSL1, BSL3, C14, dynamin, and RabE1c  
 225 associated with one to five effector families. **(C)** Interactome network of most promiscuous *N.*  
 226 *benthamiana* proteins (also referred to as the ‘usual suspects’, shown on the left) and a selection  
 227 of relatively-specific interactors (on the right) for each effector family. The usual suspects include  
 228 plant proteins associated with more than nine different effector families. The relatively-specific set  
 229 includes top three *N. benthamiana* proteins identified in colP/MS from each effector family by  
 230 following criteria: have at least three peptide hits; have the maximum peptide hits in colP/MS of  
 231 the effector family they associate within the data set; and show association with the least number  
 232 (up to five) of effector family. Effector families PexRD36, PexRD2, AVRblb1 and AVR4 did not  
 233 show association with plant proteins that fulfil the aforementioned criteria. The dotted lines indicate  
 234 associations that do not have the maximum number of peptide hits in colP/MS within the dataset.

235 The plant proteins shown in red bold text have been experimentally validated for their association  
236 with respective effector families.

237

238

239 Five host interactors of *P. infestans* RXLR effectors in our interactome matrix have  
240 been previously validated (Table S1). The cysteine protease RD21a (C14) associates  
241 with members of the AVRblb2 family (Bozkurt *et al.*, 2011; Wang *et al.*, 2015), the  
242 BSU1-like serine/threonine protein phosphatases BSL1 and BSL3 associate with  
243 members of the AVR2 family (Saunders *et al.*, 2012), dynamin 2B associates with the  
244 AVR3a family (Chaparro-Garcia *et al.*, 2015) and Ras-related protein RabE1c (also  
245 known as Rab8a) associates with PexRD54 (Pandey *et al.*, 2020) (Table S1, Figure  
246 1C). These validated host interactors associated with anywhere from 1 to 5 effector  
247 families in our experiments (Table S1). Therefore, we reasoned that host interactors  
248 showing association with five or less effector families would likely represent relatively  
249 specific interactors. Using this cut-off, we identified a set of 497 near-specific host  
250 interactors in our matrix (Dataset 2). We conclude that the interactome matrix we  
251 generated is likely to contain biologically relevant host protein-effector associations  
252 and warrants further investigation.

253

#### 254 **Interactome network analyses reveal putative host processes targeted by** 255 ***Phytophthora infestans* RXLR effector**

256

257 The host interactors of the RXLR effectors can serve as proxies to identify candidate  
258 host processes targeted by *P. infestans*. To this end, we categorized the 586 host  
259 interactors according to their Gene Ontology (GO) terms and built a GO-based  
260 interactome network from protein-to-protein binary interactions (Figure 2A, Table S2).  
261 Nodes represent plant proteins or effector families and edges represent the interaction  
262 between two proteins. Classification of the host interactors into putative functional GO  
263 categories revealed about 35 biological processes that are potentially targeted by  
264 effectors (Table S2). The network revealed that 50% of the interactions involved host  
265 proteins from three main GO categories: translation, metabolic process, and  
266 photosynthesis. Some of these may be false positives. For example, we anticipated  
267 that proteins involved in translation would associate with effectors during *in planta*  
268 expression and may be difficult to study as bona fide effector targets.

269

270 To clarify the network topology, we generated sub-networks by mapping the 497 near-  
271 specific host interactors that associated with less than five effector families (Figure  
272 2B). This sub-network revealed that edges from host proteins involved in some of the  
273 plant processes converged on a particular effector family. For example, the edges  
274 from plant proteins involved in 'small molecule transport' and 'vesicle-mediated  
275 transport' processes converged on the PexRD12/31 family of effectors; the edges from  
276 proteins assigned to the 'protein import to nucleus' process converged on the AVRvnt1  
277 family; and the edges from proteins in 'signal transduction' and 'proteolysis' processes



278 converged on the AVR2 family (Figure 2B, Table S2). To visualize these connections,  
279 we generated subnetworks for selected processes (Figure S3). These subnetworks  
280 revealed more detailed associations between individual host proteins involved in the  
281 biological process and effector families. For example, 24 out of the 32 members of the  
282 'vesicle mediated transport' process associated with the PexRD12/31 family, and  
283 seven out of nine members of the 'protein import to nucleus' associated with the  
284 AVRvnt1 family. The observation that multiple proteins assigned to the same host  
285 biological process associated predominantly with single effector families suggests that  
286 these host processes constitute targets of these effectors.  
287

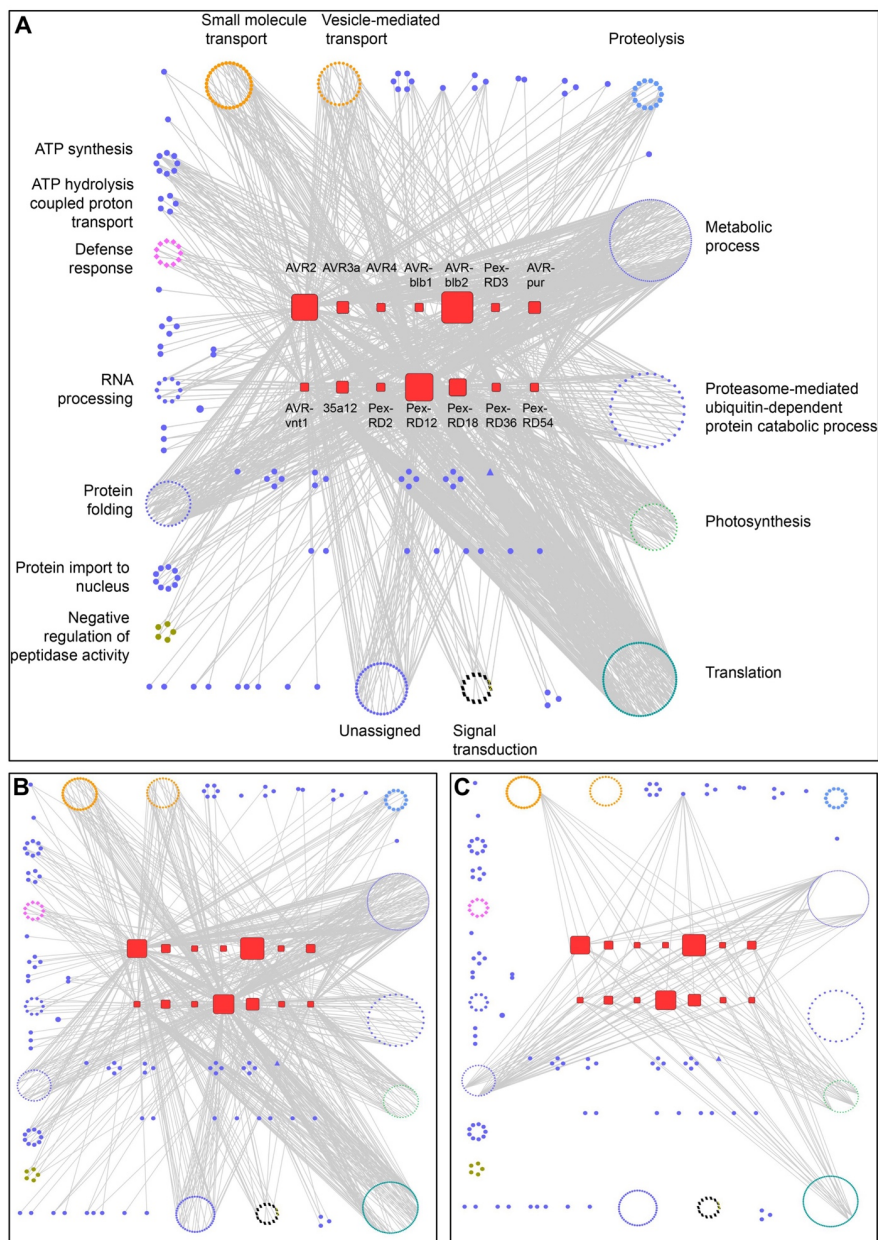

288  
289

290 **Figure 2.** Interactome network analyses reveal host biological processes likely targeted by  
291 *Phytophthora infestans* RXLR effectors.  
292 (A) General network overview of the association between the RXLR effector families and the host  
293 interactors grouped according to their predicted biological processes using Gene Ontology (GO)

294 terms. **(B)** Same as (A), with only the relatively specific associations (i.e. host interactors  
295 associated with < 5 effector families) depicted. **(C)** Same as (A), with only the redundant  
296 associations (i.e. host interactors associated with > 9 effector families) depicted.

297  
298

299 We also generated an interaction subnetwork for the 16 most promiscuous interactors  
300 that showed association with more than nine effector families (Figure 2C). This  
301 subnetwork revealed that the promiscuous host interactors are distributed across  
302 different biological processes with edges radiating towards different effector families  
303 in an indiscriminate manner, suggesting that these interactions are non-specific.  
304 Therefore, we conclude that the GO-based interactome network analysis was useful  
305 in flagging host processes likely targeted by *P. infestans* RXLR effectors as well as  
306 identifying potential non-specific interactions.

307

### 308 **PexRD12/31 proteins form a complex family of *Phytophthora infestans* RXLR- 309 WY effectors**

310

311 Given the prominence of vesicle mediated trafficking as a target of the PexRD12/31  
312 family and considering that this large effector family has not been previously  
313 functionally characterized, we decided to further characterize this family. We reasoned  
314 that PexRD12/31 effectors could serve as useful probes to shed further light on how  
315 *P. infestans* manipulates host vesicular trafficking. The PexRD12/31 family comprises  
316 19 predicted members in the genome of *P. infestans* strain T30-4 (Haas *et al.*, 2009).  
317 Two family members, PexRD12 (PITG\_16245) and PexRD31 (PITG\_23074), were  
318 previously reported in *P. infestans* isolate 88069 and included in *in planta* screens for  
319 AVR activities (Vleeshouwers *et al.*, 2008; Oh *et al.*, 2009). PexRD12 is recognized  
320 by *Rpi-chc1*, a *Solanum chacoense* resistance gene against *P. infestans* (Vossen *et al.*,  
321 2017). Sequence analyses of the 19 predicted genes revealed that two members  
322 (PITG\_23230 and PITG\_20336) lack the effector domain and one divergent member  
323 (PITG\_09577) lacks the signature RXLR-EER motif. To evaluate the sequence  
324 diversity of the remaining 16 family members, we compared the amino acid sequence  
325 of their effector domains (Figure 3). Phylogenetic analyses grouped 15 of the 16  
326 members into four clades supported by bootstrap values over 90%, while one  
327 divergent member (PITG\_16428) contained a 10 amino acid insertion in the effector  
328 domain and did not cluster with any of the other proteins (Figure 3). The effector  
329 domains of the canonical family members comprise 62 amino acids and all 16 proteins  
330 contained a single predicted WY-fold based on HMMER searches (E value < 1.8<sup>-07</sup>)  
331 (Boutemy *et al.*, 2011). Proteins within each of the four clades displayed an average  
332 pairwise amino acid identity of over 95% in their effector domains. We conclude that  
333 the PexRD12/31 family of *P. infestans* RXLR-WY effectors is structured into four  
334 clades of highly similar proteins with PITG\_16428 as a fifth divergent member of the  
335 family.

336

337

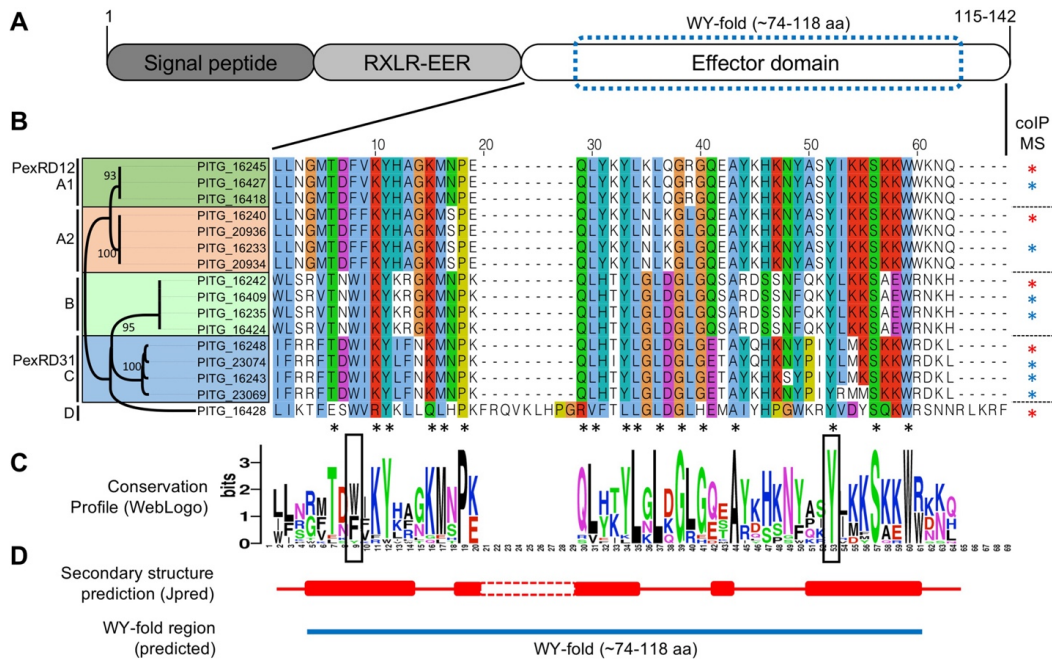

338

339

340 **Figure 3.** *Phytophthora infestans* PexRD12/31 family of RXLR effectors group into four distinct  
 341 classes.

342 **(A)** Schematic diagram of the canonical protein domain organization of PexRD12/31 proteins.  
 343 Numbers indicate minimal and maximal peptide length of the effectors. **(B)** Phylogenetic tree and  
 344 amino acid alignment of the C-terminal domain of the 16 members of the PexRD12/31 family. The  
 345 family consists of four distinct groups (A1, A2, B and C) and PITG\_16428 on its own in D. The  
 346 phylogenetic relationship within the PexRD12/31 family members was inferred by using the  
 347 Maximum Likelihood method and JTT matrix-based model implemented in MEGA X. Simplified  
 348 version of the tree with the highest log likelihood (-561.03) is shown. The percentage of trees in  
 349 which the associated taxa clustered together is shown next to the branches. All positions  
 350 containing gaps and missing data were eliminated. There was a total of 54 positions in the final  
 351 dataset. Amino acid residues are colored according to the ClustalX scheme. The black asterisks  
 352 indicate the amino acid residues that are conserved in  $\geq 90\%$  of the sequences. The blue asterisks  
 353 indicate effectors used for the first colP/MS screen; the red asterisks indicate effectors used for  
 354 both the colP/MS screen and follow-up experiments. **(C)** WebLogo conservation profile of the  
 355 sequence alignment shown in B. **(D)** Jpred4-predicted alpha helices and predicted WY-fold in  
 356 PexRD12/31 family members. Solid red cylinders indicate predicted helices based on the  
 357 sequences of PITG\_16424 and PITG\_23074. The predicted WY-fold region is indicated by a blue  
 358 bar.

359

360 **PexRD12/31 effectors consistently associate with vesicle trafficking-related**  
 361 **host proteins in independent coimmunoprecipitation/mass spectrometry**  
 362 **experiments**  
 363

364 To further explore the association between PexRD12/31 effectors and host proteins  
 365 implicated in vesicle trafficking, we fused the effectors to green fluorescent protein  
 366 (GFP) and used them in additional colP/MS experiments. We selected one  
 367 PexRD12/31 family representative from each of the four clades: PexRD12, PexRD31,  
 368 PITG\_16242, and PITG\_16428 (Figure 3). We expressed the GFP effector fusion  
 369 proteins in *N. benthamiana* leaf cells by agroinfiltration and performed colP/MS using  
 370 anti-GFP antibodies under the stringent conditions described in the methods (Dataset

371 3). All the fusion proteins could be detected after colP by either SDS-PAGE  
372 Coomassie blue staining, mass spectrometry, or both, indicating effective expression  
373 and immunoprecipitation (Figure S4). These assays yielded 24 out of the 30 vesicle  
374 trafficking-related host proteins that we previously identified in the anti-FLAG colP/MS  
375 screen (Table S3). Among these 24 proteins, 16 associated with no more than four  
376 bait proteins throughout our laboratory dataset of over a hundred independent  
377 colP/MS assays (Dataset 1, Dataset 2) (Petre *et al.*, 2015; Petre *et al.*, 2016). We  
378 conclude that these 16 *N. benthamiana* proteins are relatively-specific interactors of  
379 PexRD12/31 effectors in colP/MS assays.

380

### 381 **PexRD12/31 effectors associate with *Nicotiana benthamiana* R-SNARE protein** 382 **of the VAMP72 family**

383

384 Vesicle associated membrane proteins (VAMPs, also known as R-SNAREs) are  
385 components of secretory vesicles and endosomes that mediate vesicle fusion. VAMPs  
386 have been implicated in plant pathogen response (Collins *et al.*, 2003; Kwon *et al.*,  
387 2008; Yun and Kwon, 2017) but are not known to be targeted or associated with  
388 pathogen effectors. Our FLAG colP/MS assays identified a protein annotated as  
389 vesicle associated membrane protein (VAMP) 7B (Sol Genomics Network (SGN)  
390 accession NbS00022342g0004) by two peptide hits in Mascot searches from IP of  
391 effector PITG\_16428, a member of PexRD12/31 family (Figure S5). In addition, other  
392 PexRD12/31 effectors were also shown to consistently and specifically associated  
393 with VAMP 7B in the GFP colP/MS assays (Table S3). VAMPs occur as multiple  
394 paralogs in *N. benthamiana* (Figure S5). To further characterize the sequence of  
395 NbS00022342g0004 we performed BLASTP (BLAST 2.9.0+) (Altschul *et al.*, 1997)  
396 searches against the *A. thaliana* proteome version Araport11 in which VAMPs are  
397 comprehensively annotated (The Arabidopsis Information Resource,  
398 <https://www.arabidopsis.org>). The top hit was AT1G04760, annotated as AtVAMP726,  
399 with an E value of  $2^{-126}$  and a score of 357. To determine the relationship between  
400 NbS00022342g0004 and *A. thaliana* VAMPs, we extracted all members of AtVAMP72  
401 family (AtVAMP721-727) from Araport11 and 14 VAMP72-like amino acid sequences  
402 from the proteome of *N. benthamiana* (Sol Genomics Network, version 0.44).  
403 Phylogenetic analyses of these sequences revealed that NbS00022342g0004 does  
404 not have a clear ortholog in *A. thaliana* within the VAMP72-family (Figure S5) and  
405 therefore we decided to refer to it from here on as NbVAMP72x.

406

407 To further evaluate whether PexRD12/31 effectors physically associate with  
408 NbVAMP72x *in planta*, we combined colP and immunoblot assays. We co-expressed  
409 eight FLAG tagged PexRD12/31 effectors with GFP-NbVAMP72x in *N. benthamiana*  
410 leaf cells and performed immunoprecipitations with anti-FLAG and anti-GFP  
411 antibodies bound to agarose beads. These colP assays revealed that seven tested  
412 PexRD12/31 effectors associated with NbVAMP72x *in planta* (Figure 4). One effector,  
413 PITG\_16427, did not associate with NbVAMP72x. However, PITG\_16427 did not

414 accumulate to detectable levels in the input samples indicating that the protein is not  
415 stable *in planta* and making the IP assay inconclusive (Figure 4). The negative control  
416 FLAG-AVR3a, which did not associate with NbVAMP72x in the coIP/MS screens  
417 described earlier, also did not associate with NbVAMP72x in the coIP/immunoblot  
418 experiments. We conclude that members of the PexRD12/31 family associate with  
419 NbVAMP72x *in planta*.  
420  
421

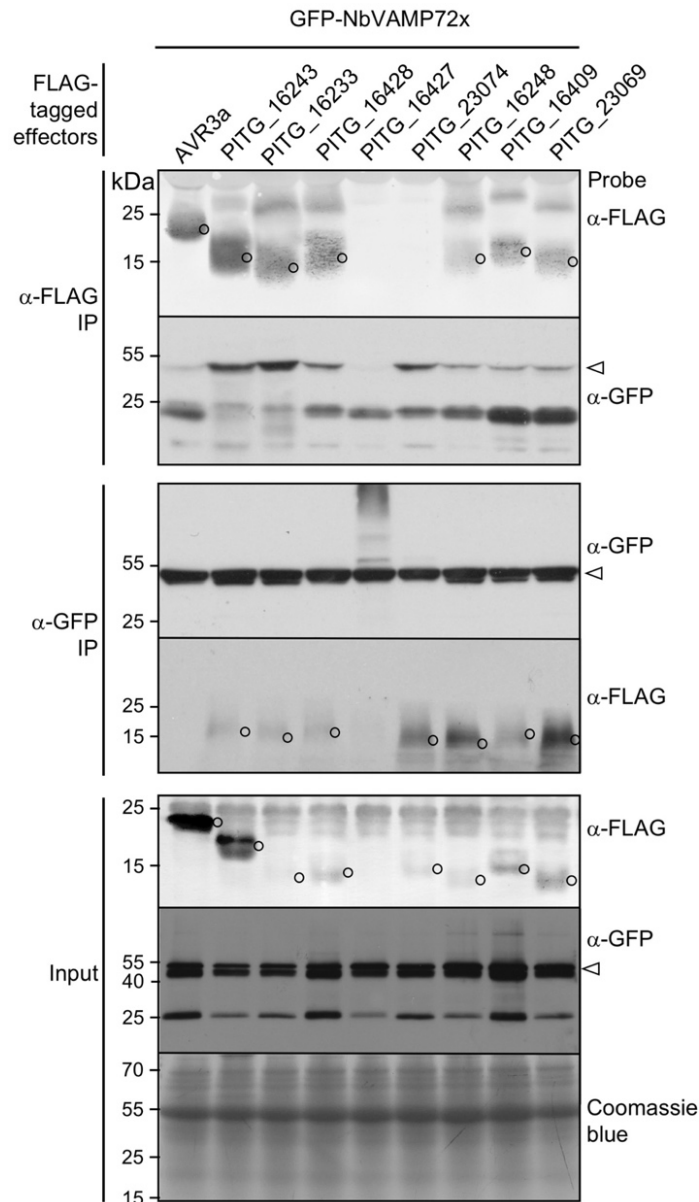

422  
423  
424  
425  
426  
427  
428  
429  
430

**Figure 4.** PexRD12/31 effectors associate with NbVAMP72x *in planta*.

Immunoblots show FLAG-tagged PexRD12/31 family effector fusion proteins coimmunoprecipitate with GFP-tagged NbVAMP72x transiently co-expressed in *N. benthamiana*. Approximate molecular weights of the proteins are shown on the left. Open arrowhead shows the expected size of the NbVAMP72x bands and open circles show the expected sizes of the effector bands. IP = immunoprecipitation.

431 **PexRD12/31 effectors mainly accumulate at the host plasma membrane**

432

433 To determine the subcellular localization of PexRD12/31 effectors in plant cells, we  
434 expressed the GFP N-terminally tagged PexRD12, PexRD31, PITG16242, and  
435 PITG16428 described above in *N. benthamiana* leaf cells by agroinfiltration and  
436 performed live cell imaging by confocal microscopy. GFP-tagged PexRD31,  
437 PITG16242, and PITG16428 produced informative fluorescent signals that distributed  
438 mainly at the cell periphery (Figure S6). In addition, the GFP-PexRD31 fluorescent  
439 signal accumulated sharply around the nucleus and in small and mobile puncta. GFP-  
440 PexRD12 was not informative as it produced a weak fluorescent signal and triggered  
441 a necrotic response in leaves that interfered with the imaging.

442

443 To evaluate the robustness of these observations, we performed similar live cell  
444 imaging experiments with effectors N-terminally tagged with the fluorescent protein  
445 mCherry (Figure S6). We observed similar patterns for PexRD31, PITG16242, and  
446 PITG16428 with the fluorescence signal accumulating mainly at the cell periphery.  
447 Here too, mCherry-PexRD12 triggered a necrotic response with no clear fluorescent  
448 signal. Interestingly, as observed with the GFP fusion, mCherry-PexRD31 labelled the  
449 nuclear periphery and mobile cytosolic puncta in addition to the cell periphery, and we  
450 documented these mobile signals in a movie (Movie S1).

451

452 To determine whether PexRD31, PITG16242, and PITG16428 accumulate at the  
453 plasma membrane, we co-expressed the mCherry fusion proteins with the plasma  
454 membrane marker protein YFP-Rem1.3 in *N. benthamiana* using agroinfiltration  
455 (Bozkurt *et al.*, 2015) and contrasted them to co-expression with cytosolic free GFP  
456 (Figure 5). All three effectors produced a sharp fluorescent signal on the outside edge  
457 of the cytosol that overlapped with the YFP-Rem1.3 fluorescent signal and showed no  
458 detectable background in the cytosol (Figure 5).

459

460 We conclude that the three effectors accumulate at the plasma membrane when  
461 expressed in *N. benthamiana* cells. We also noted that the mCherry-PexRD31 mobile  
462 puncta reported above overlapped with the cytosolic GFP signal. In summary, we  
463 conclude that all three effectors accumulate at the plasma membrane, and that  
464 PexRD31 also localizes to mobile cytosolic bodies.

465

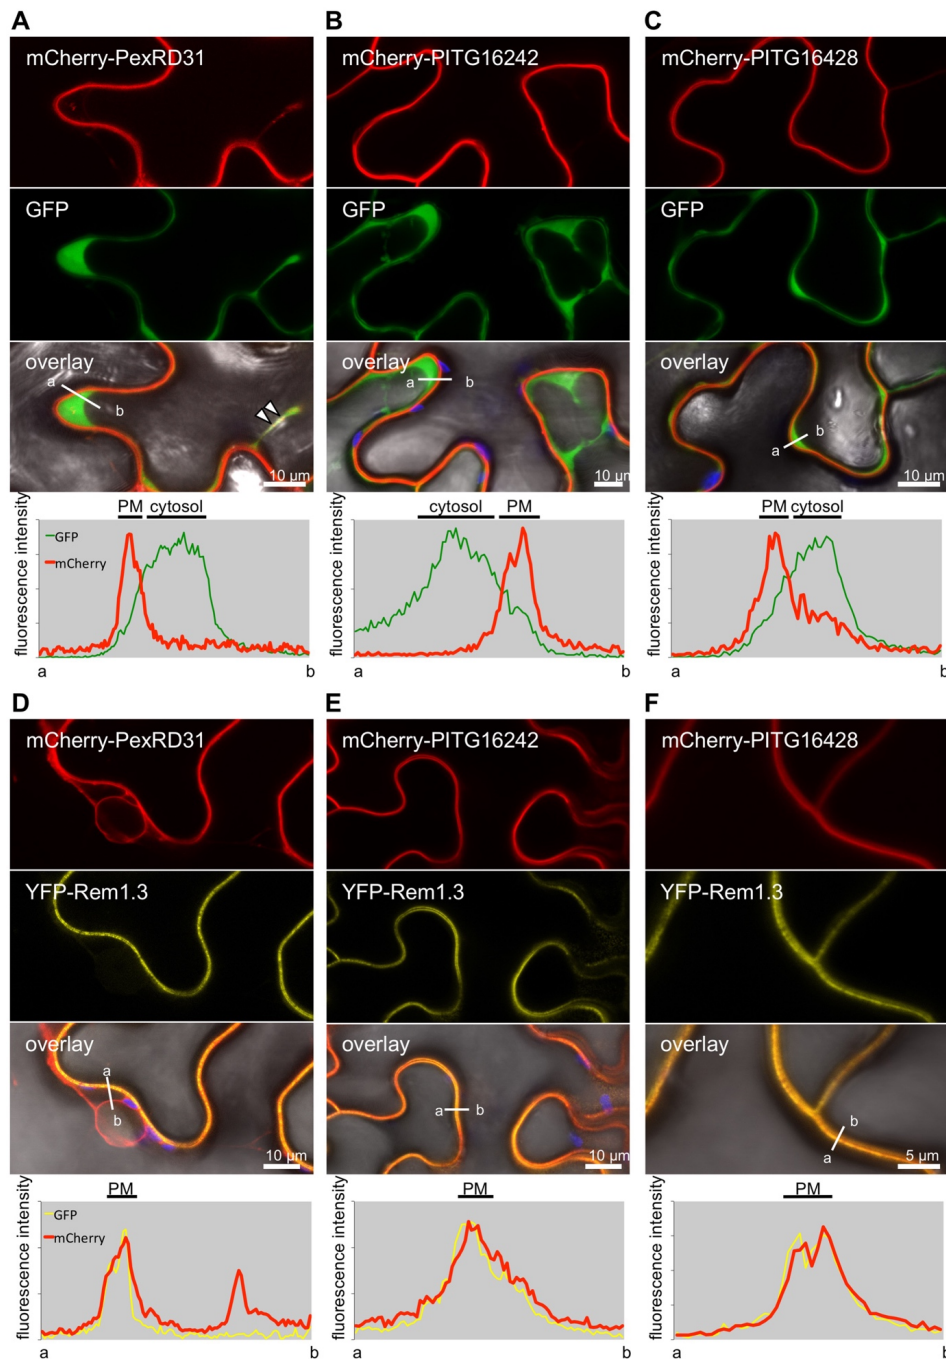

466

467

468 **Figure 5.** PexRD12/31 effectors accumulate at the host plasma membrane.

469 mCherry-PexRD31, mCherry-PITG16242 and mCherry-PITG16428 were co-expressed with free

470 green fluorescent protein (GFP) or with the plasma membrane (PM) marker YFP-Rem1.3 via

471 agroinfiltration in *N. benthamiana* leaves. Live-cell imaging was performed with a laser-scanning

472 confocal microscope three days after infiltration. (A-F) Confocal microscopy of *N. benthamiana*

473 leaf epidermal cells co-expressing mCherry-PexRD31, mCherry-PITG16242 or mCherry-

474 PITG16428 with free GFP (A-C) or PM marker YFP-Rem1.3 (D-F). All three effectors show PM

475 localization, while mCherry-PexRD31 also accumulated in cytosolic puncta (white arrowheads).

476 Images are single optical sections of 0.8 μm. The overlay panel combines GFP (A-C) or YFP (D-

477 F), mCherry, chlorophyll, and bright field images. The lower panels show relative fluorescence

478 intensity plots of the GFP (A-C, green sharp line) or YFP (D-F, yellow sharp line) and the mCherry

479 (red thick line) signals along the line from a to b depicted in the corresponding overlay panels.

480 **PexRD31 localizes to RabC1-positive mobile vesicles of the post-**  
481 **Golgi/endosomal network**

482

483 We further investigated the localization of PexRD31 cytosolic mobile puncta by co-  
484 expressing its GFP or mCherry fusions with a set of eleven fluorescent proteins that  
485 mark different plant cell endomembrane compartments and organelles. These include  
486 secretory vesicles (NbVAMP72x-mRFP), peroxysomes (GFP-PTS1), Golgi (MAN1<sub>1-</sub>  
487 <sub>49</sub>-GFP), phosphatidylinositol-3-phosphate (PI3P)-positive vesicles (2xFYVE-GFP),  
488 endoplasmic reticulum (ER, WAK2<sub>SP</sub>-GFP-HDEL), autophagosomes (GFP-ATG8C),  
489 early and late endosomes (mRFP-ARA7), late endosomes and multi vesicular bodies  
490 (ARA6-mRFP), exocyst-positive organelle (EXPO, Exo70E2-GFP), mitochondria  
491 (COX4<sub>1-29</sub>-GFP), and post-Golgi/endosomal network (YFP-RabC1) (Nelson *et al.*,  
492 2007; Voigt, 2008; Heard *et al.*, 2015; Dagdas *et al.*, 2016). Among these, we noted a  
493 distinct overlap in the fluorescent signals produced by mCherry-PexRD31 and YFP-  
494 RabC1 (Figure 6). These overlapping signals marked mobile puncta that are probably  
495 cytosolic vesicles associated with post-Golgi endosomal elements (Geldner *et al.*,  
496 2009). These observations were specific to PexRD31 since another member of the  
497 PexRD12/31 family, PITG16242, did not co-localize with YFP-RabC1 (Figure 6C). The  
498 colocalization between PexRD31 and RabC1 was also specific in our experiments, as  
499 PexRD31 fluorescent signals did not overlap with any of the other ten markers (Figure  
500 S7). Notably, aside from colocalization with RabC1, PexRD31 signals did not overlap  
501 with other markers associated with the post-Golgi endosomal network, such as early  
502 and late endosomes, secretory vesicles and Golgi bodies (Figure S7). We conclude  
503 that PexRD31 specifically localizes to RabC1-positive mobile vesicles and that this  
504 localization is specific to PexRD31.



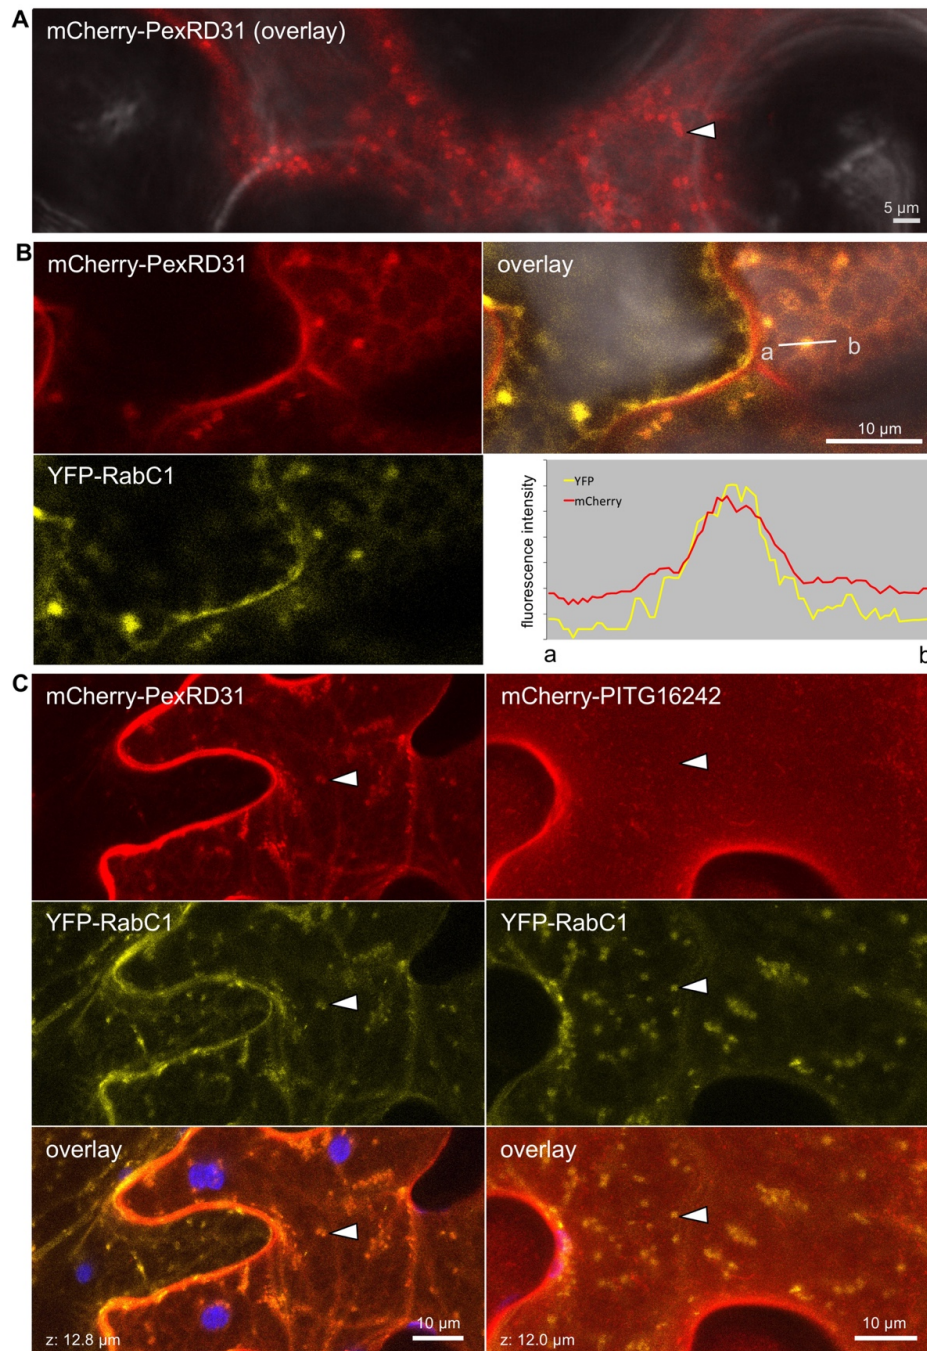

505

506

507

508

509

510

511

512

513

514

515

516

517

518

**Figure 6.** PexRD31 accumulates at RabC1-positive mobile vesicles.

**(A)** Confocal microscopy of *N. benthamiana* leaf epidermal cells expressing mCherry-PexRD31. The panel shows an overlay of the mCherry and bright field channels. It corresponds to the first image of Movie S1. **(B)** Confocal microscopy of *N. benthamiana* leaf epidermal cells co-expressing mCherry-PexRD31 and YFP-RabC1. The right-hand side panel shows relative fluorescence intensity plots of the YFP and the mCherry along the line from a to b depicted in the corresponding overlay panel. **(C)** Confocal microscopy of *N. benthamiana* leaf epidermal cells co-expressing mCherry-PexRD31 or mCherry-PITG16242 with YFP-RabC1. In all cases proteins were expressed in leaf cells by agroinfiltration. Live-cell imaging was performed with a laser-scanning confocal microscope three days after infiltration. Images are single optical sections of 0.8  $\mu\text{m}$  or maximal projections of 10 optical sections (max. z-stack: 12.8  $\mu\text{m}$ ). The overlay panels combine YFP, mCherry, and chlorophyll channels.

519 **PexRD12/31 effectors accumulate at haustoria in *Phytophthora infestans*-**  
520 **infected *Nicotiana benthamiana* cells**

521

522 We previously reported that several endomembrane compartments are directed  
523 towards *P. infestans* haustoria during infection (Bozkurt *et al.*, 2012; Bozkurt *et al.*,  
524 2015; Dagdas *et al.*, 2018; Bozkurt and Kamoun, 2020). In addition, some effectors  
525 display perihyphae localization accumulating around haustoria in infected plant cells  
526 (Bozkurt *et al.*, 2011; Saunders *et al.*, 2012; Dagdas *et al.*, 2018; Wang *et al.*, 2018).  
527 To investigate whether this applies to the PexRD12/31 family, we determined the  
528 subcellular localization of the mCherry fusions of PexRD31, PITG16242, and  
529 PITG16428 in haustoriated cells of *N. benthamiana* (Figure 7) using established  
530 protocols and methods (Bozkurt *et al.*, 2011). All three proteins produced sharp  
531 fluorescent signals around haustoria indicating that they are perihyphae effectors  
532 and accumulate at the haustorial interface when expressed in infected haustoriated  
533 plant cells (100% of haustoria imaged, N>60) (Figure 7A-C).

534

535 In plants infected with *Phytophthora*, the host side of the haustorial interface is  
536 comprised of the extra-hyphae membrane (EHM), a thin layer of cytosol and the  
537 tonoplast that tends to be in close proximity to the EHM (Bozkurt *et al.*, 2012). To  
538 further determine where the PexRD12/31 effectors accumulate, we co-expressed in  
539 *N. benthamiana* their mCherry fusions with YFP-Rem1.3, a marker that sharply labels  
540 EHM microdomains (Bozkurt *et al.*, 2014). The fluorescent signal produced by the  
541 three effectors overlapped with the YFP-Rem1.3 signal indicating that these effectors  
542 accumulate at the EHM (Figure 7D-F).

543

544 Experiments with *P. infestans*-infected *N. benthamiana* tissue enabled us to visualize  
545 the mCherry-PexRD31 puncta in haustoriated cells. Some of these puncta were  
546 immobile and were in proximity to the haustorial interface, enabling us to image them  
547 at higher resolution. This revealed that mCherry-PexRD31 produced a sharp circular  
548 fluorescent signal that can be observed near haustoria (N>20) (Figure 7). We conclude  
549 that PexRD31 accumulates at vesicle-like structures and probably localizes on the  
550 outside of these vesicles. Consistent with our previous observations with non-infected  
551 *N. benthamiana* cells (Figure 5, Figure 6), PITG16242 and PITG16428 differed from  
552 PexRD31 and did not label vesicle-like structures. Altogether, these data indicate that  
553 PexRD31, PITG16242, and PITG16428 accumulate at the EHM around *P. infestans*  
554 haustoria. In addition, PexRD31 accumulates in vesicle-like structures in proximity to  
555 the haustorial interface.

556

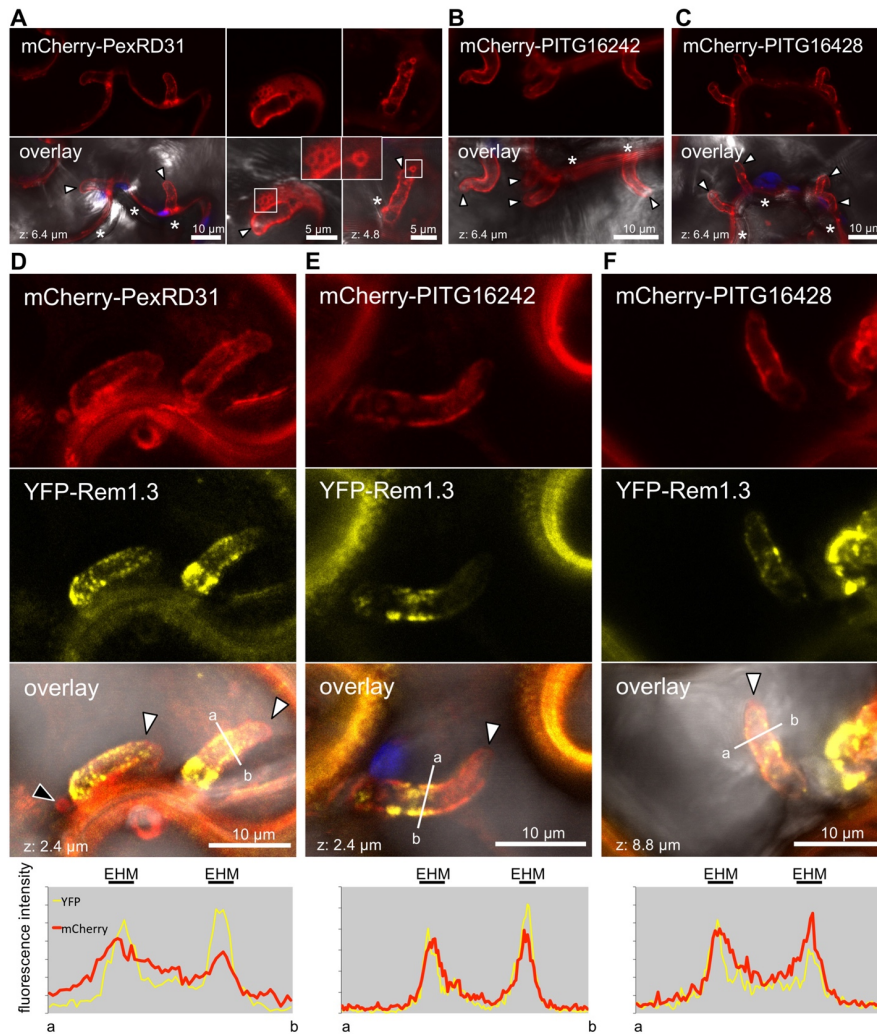

557  
558  
559  
560  
561  
562  
563  
564  
565  
566  
567  
568  
569  
570  
571  
572  
573  
574  
575  
576  
577  
578  
579

**Figure 7. PexRD12/31 effectors accumulate around haustoria.**

mCherry-PexRD31, mCherry-PITG16242 or mCherry-PITG16428 were expressed on their own or co-expressed with YFP-Rem1.3 in leaf cells by agroinfiltration, and leaves were drop inoculated with zoospores of *P. infestans* isolate 88069 three hours after agroinfiltration. Live-cell imaging was performed with a laser-scanning confocal microscope three days after infection. **(A)** Confocal microscopy of *P. infestans* infected *N. benthamiana* leaf epidermal cells expressing mCherry-PexRD31. mCherry-PexRD31 around haustoria and at perihyphal vesicles. The two panels on the right-hand side show mCherry-labelled vesicles in contact with haustoria. The inserts in the overlay panels show a close-up of these vesicles. **(B and C)** Confocal microscopy of *P. infestans* infected *N. benthamiana* leaf epidermal cells expressing mCherry-PITG16242 and mCherry-PITG16428, respectively. Both effectors accumulated around haustoria. **(D)** Confocal microscopy of *P. infestans* infected *N. benthamiana* leaf epidermal cells co-expressing mCherry-PexRD31 and PM and EHM marker YFP-Rem1.3. The black arrowhead indicates a PexRD31-labelled vesicle in close proximity to the leaf haustorium. **(E and F)** Confocal microscopy of *P. infestans* infected *N. benthamiana* leaf epidermal cells co-expressing mCherry-PITG16242 and mCherry-PITG16428 (respectively) with PM and EHM marker YFP-Rem1.3. Images are single optical sections of 0.8  $\mu\text{m}$  or maximal projections of 11 optical sections (max. z-stack of 8.8  $\mu\text{m}$ ). The overlay panels combine YFP (D-F), mCherry, chlorophyll, and bright field images. White arrowheads indicate haustoria. For (A-C), white asterisks indicate extracellular hyphae, which can be out of focus. For (D-F), lower panel show relative fluorescence intensity plots of the YFP and the mCherry along the line from a to b depicted in the corresponding overlay panel.

580 **PexRD31 increases the number of FYVE-labelled endosomes in**  
581 ***Nicotiana benthamiana* cells**

582

583 During co-expression experiments with the FYVE marker (2xFYVE-GFP), we noted  
584 that PexRD31 appears to increase the number of GFP-labelled endosomes. We  
585 further investigated this observation by using agroinfiltration to express the mCherry  
586 fusions to PexRD31, PITG16242, and PITG16428 in leaves of transgenic *N.*  
587 *benthamiana* expressing 2xFYVE-GFP (Figure 8A-B). In independent experiments,  
588 mCherry-PexRD31 increased the number of FYVE-labelled endosomes by about 40%  
589 compared to mCherry and the other two effectors (n=40).

590

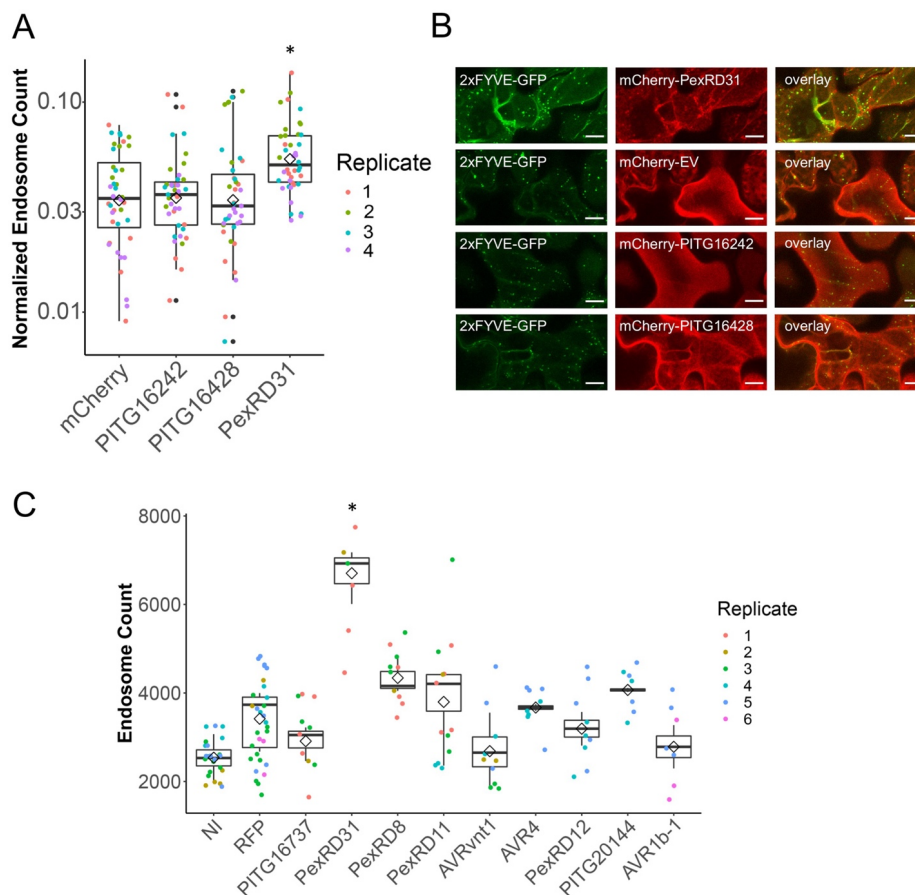

591

592

593 **Figure 8.** PexRD31 increases the number of FYVE labelled endosomes in *Nicotiana benthamiana*  
594 cells.

595 **(A)** Categorical scatterplots with superimposed boxplots displaying the number of 2xFYVE-GFP  
596 endosomes per  $\mu\text{m}^2$  of cytoplasm in cells expressing mCherry-PexRD31, mCherry-PITG\_16242,  
597 mCherry-PITG16428, or mCherry. The number of 2xFYVE-GFP-labelled endosomes was  
598 significantly enhanced by the expression of mCherry-PexRD31 (\* =  $p < 0.01$ ). The data are  
599 representative of 40 maximum projection images from 4 biological replicates. Each replicate  
600 consists of 10 individual Z-stacks of 17 slices per treatment. Images were taken 3 days post  
601 infiltration. **(B)** Representative images of transient expression of mCherry-PexRD31, mCherry-EV,  
602 mCherry-PITG\_16242 and mCherry-PITG\_16428 in leaf epidermal cells of transgenic *N.*  
603 *benthamiana* lines expressing 2xFYVE-GFP. Scale bar =  $10\mu\text{m}$ . **(C)** Categorical scatterplots with  
604 super-imposed boxplots displaying the number of 2xFYVE-GFP endosomes per field of view in the  
605 presence of different FLAG-tagged effectors, RFP, or with no agroinfiltration (NI). 2xFYVE-GFP  
606 endosomes were significantly enhanced by the expression of PexRD31 (\* =  $p < 0.01$ ) with respect

607 to the NI and RFP controls and the other effectors assayed. None of the other effectors assayed  
608 significantly increased the number of 2xFYVE-GFP-labelled endosome numbers. We obtained 2,  
609 3 or 4 biological replicates per treatment, with each replicate consisting of 4 individual z-stacks of  
610 12 slices each per treatment. The data consist of averaged counts obtained from individual slices  
611 conforming each z-stack. Images were acquired 3 days post-infiltration.

612  
613

614 We also compared PexRD31 with nine *Phytophthora* RXLR effectors selected from  
615 our collection, which allowed to estimate the degree to which the observed activity is  
616 specific. These assays were done with a different expression vector system and  
617 experimental setup to determine the robustness of the effect. We performed  
618 agroinfiltration to express the FLAG tagged effector constructs used earlier in the colP  
619 experiments in the 2xFYVE-GFP transgenic *N. benthamiana* plants. PexRD31  
620 significantly increased the number of 2xFYVE-GFP labelled endosomes, resulting in  
621 an increase of 40 to 90% compared to the all other effectors and 90% compared to  
622 the negative control (Figure 8C). PexRD31 was the only effector to show a statistically  
623 significant increase with respect to the RFP control. We conclude that PexRD31  
624 specifically alters vesicle trafficking by increasing the number of PI3P endosomes  
625 labelled by the FYVE marker.

626

#### 627 **FYVE-labelled endosomes accumulate in *Nicotiana benthamiana* tissue** 628 **colonized by *Phytophthora infestans***

629

630 To determine whether the effect of PexRD31 on FYVE-labelled endosomes can be  
631 recapitulated with the pathogen, we examined the number and distribution of FYVE-  
632 labelled endosomes during *P. infestans* infection of *N. benthamiana* leaves. To this  
633 end, we inoculated *N. benthamiana* plants expressing 2xFYVE-GFP with *P. infestans*  
634 88069td, a transgenic strain expressing the red fluorescent marker tandem dimer RFP  
635 (tdTomato) (Whisson *et al.*, 2007; Giannakopoulou *et al.*, 2014). We evaluated  
636 2xFYVE-GFP fluorescence signals relative to the RFP fluorescence and focused our  
637 imaging on the edge of the disease lesions where haustoria are produced and which  
638 corresponds to the biotrophic phase of infection (van West *et al.*, 1998; Lee and Rose,  
639 2010). Using low magnification confocal microscopy, we noted that leaf areas  
640 biotrophically colonized by *P. infestans* display bright and large GFP puncta; such  
641 puncta were absent in non-colonized areas (Figure 9A). *N. benthamiana* cells with  
642 GFP puncta signals were in direct contact with *P. infestans* hyphae, whereas the non-  
643 colonized areas surrounding the lesions showed hardly any GFP puncta signals.  
644 2xFYVE-GFP puncta were mobile, with a maximal diameter of 2 $\mu$ m (Figure 9B, Movie  
645 S2). We compared these patterns to *P. infestans* infections of *N. benthamiana* stable  
646 transgenics expressing free GFP (marking the nucleus and the cytosol) or a YFP-  
647 RabG3c fusion (marking late endosomes and the tonoplast). In both cases, there was  
648 no evident alteration of the distribution of the fluorescence signals in tissue colonized  
649 by *P. infestans* (Figure S8), indicating that *P. infestans* specifically perturbs 2xFYVE-  
650 GFP-positive compartments during the biotrophic colonization of *N. benthamiana*.

651

652

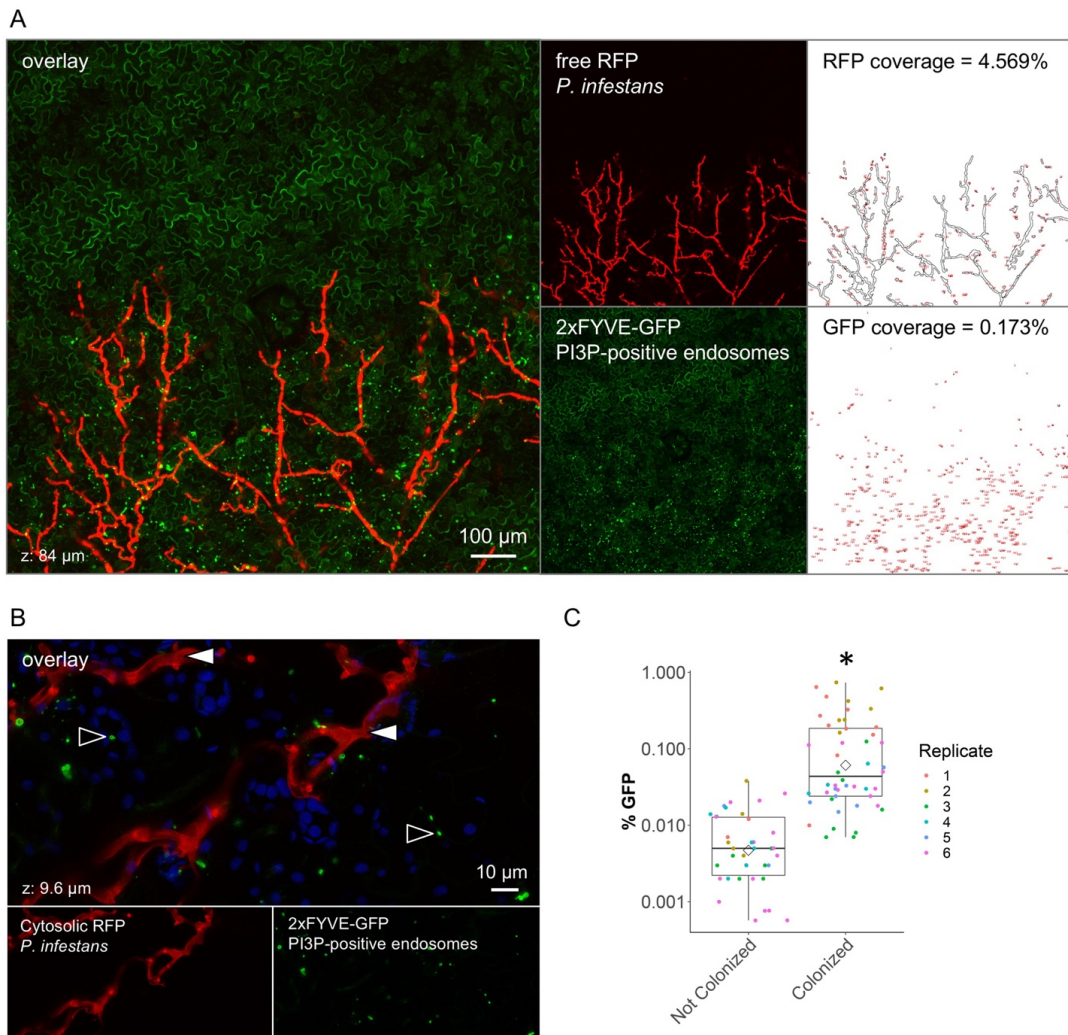

653

654

655 **Figure 9.** FYVE-labelled endosomes accumulate in leaf cells colonized by *Phytophthora infestans*.

656 **(A)** Low magnification live cell imaging of a 2xFYVE-GFP fusion (marker of PI3P-positive

657 endosomes) in *N. benthamiana* leaf cells colonized by *P. infestans* isolate 88069td. The right-hand

658 side panels show processed images used for the quantification of the image area displaying an

659 RFP (upper panel) or a GFP puncta (lower panel) fluorescent signal, expressed as a percentage

660 of the total image area. Images are maximal projections of 21 optical sections (z-stack of 84  $\mu\text{m}$ ).

661 **(B)** High magnification live cell imaging of a 2xFYVE-GFP fusion in *N. benthamiana* leaf cells

662 colonized by *P. infestans* isolate 88069td. In the overlay image, black-lined white arrows indicate

663 *P. infestans*, and white-lined black arrows indicate FYVE-labelled puncta. Images are maximal

664 projections of 12 optical sections (z-stack of 9.6  $\mu\text{m}$ ). **(C)** Categorical scatterplots with

665 superimposed boxplots showing the semi-automated quantification of GFP puncta coverage from

666 confocal microscopy images corresponding to leaf areas biotrophically colonized by *P. infestans*

667 ('Colonized') or leaf areas without *P. infestans* (Not Colonized). (\* =  $p < 0.01$ ) Leaves of stable

668 transgenic *N. benthamiana* plants were drop inoculated by zoospores of *P. infestans* isolate

669 88069td. Live-cell imaging was performed with a laser-scanning confocal microscope three days

670 after inoculation. The overlay panels combine (A) GFP and RFP channels, or (B) GFP, RFP, and

671 chlorophyll channels.

672

673 To further evaluate the correlation between the presence of *P. infestans* hyphae and

674 the formation of FYVE-labelled puncta, we performed a blind confocal microscopy

675 image acquisition analysis. We acquired 13 z-stacks of 11 images over leaf tissues  
676 colonized by *P. infestans* 88069td and surrounding non-colonized areas (see  
677 methods). Next, we developed and applied an automatic analytical pipeline using the  
678 ImageJ package Fiji (Schindelin *et al.*, 2012) to quantify *P. infestans* red  
679 fluorescence and punctate GFP-FYVE fluorescence signals. This experiment further  
680 showed that 2xFYVE-GFP-positive puncta signals increased in *N. benthamiana*  
681 tissue during the biotrophic stage of *P. infestans* infection compared to the non-  
682 colonized areas of leaf tissue (Figure 9C). This set of experiments indicate that *P.*  
683 *infestans* alters host endosome trafficking during biotrophic colonization.

684

## 685 DISCUSSION

686

687 A major research aim in the field of molecular plant pathology is to unravel the activities  
688 of effectors in order to understand how pathogens successfully colonize their hosts.  
689 The rationale behind this project is based on the view that effectors can serve as  
690 molecular probes to identify the host processes that pertain to pathogen interactions.  
691 We applied an effectoromics pipeline centered on an *in vivo* proteomics-based protein-  
692 protein interaction screen. This screen revealed that ~50 *P. infestans* RXLR effectors  
693 associate *in planta* with ~580 unique *N. benthamiana* proteins representing as many  
694 as 35 biological processes. We conclude that *P. infestans* RXLR effectors target  
695 multiple processes in their host plants; and our study provides a broad overview of  
696 these effector-targeted processes.

697

698 We previously reported *in planta* proteomics screens for interactors of candidate  
699 effectors of the rust fungal pathogens *Melampsora larici-populina* and *Puccinia*  
700 *striiformis* f sp *tritici* (Petre *et al.*, 2015; Petre *et al.*, 2016). Our study also complements  
701 large-scale yeast-two-hybrid screens for effector interactors of the oomycete plant  
702 pathogen *Hyaloperonospora arabidopsidis*, the bacterium *Pseudomonas syringae*  
703 and the powdery mildew fungus *Golovinomyces orontii* (Mukhtar *et al.*, 2011; Weßling  
704 *et al.*, 2014). As previously discussed (Petre *et al.*, 2015; Petre *et al.*, 2016), *in planta*  
705 protein-protein interaction assays have both advantages and disadvantages  
706 compared to the more commonly used yeast-two hybrid assay. Given that the coIP  
707 assay takes place *in vivo* in plant tissue, the host proteins are expressed in a  
708 biologically relevant molecular context and cellular compartment. Another difference  
709 is that yeast two-hybrid interactions are presumably binary, detecting one-on-one  
710 protein interactions, whereas the proteins we identified by coIP/MS may not directly  
711 bind the effector but could instead associate in a multi-protein complex. Indeed, our  
712 observation that functionally related plant proteins tend to associate with a given  
713 effector family increases the probability that the targeted host complex or process is  
714 physiologically relevant (Figure 2).

715

716 One drawback of the colP method is that a direct host interactor may be missed even  
717 when relevant associated proteins are recovered. This could be due to several factors,  
718 such as abundance of the interacting plant proteins, absence of a suitable tryptic  
719 peptide detectable by mass spectrometry, or absence of the protein sequence in the  
720 annotated database used for the mass spectra searches. Also, given that mass  
721 spectrometry sampling of peptides is random, a target protein may be missed by  
722 chance. One example is the *P. infestans* RXLR-WY effector PexRD54, which binds  
723 with high affinity to the autophagy protein ATG8CL (Dagdas *et al.*, 2016; Maqbool *et al.*,  
724 2016). Although ATG8CL was missing from the initial colP/MS screen it was picked  
725 up in two out of four subsequent experiments (Dagdas *et al.*, 2016). This might be due  
726 to the low molecular weight of ATG8CL (~14 kDa), which may not have produced  
727 enough peptides for MS detection. Interestingly, we flagged ATG8C as likely to directly  
728 bind PexRD54 because their interaction survived stringent binding conditions in  
729 contrast to other candidate interactors (Dagdas *et al.*, 2016). Rab8a, another interactor  
730 identified in the original PexRD54 colP/MS experiment, was recently reported as a  
731 genuine target of PexRD54 that associates with this effector independently of ATG8CL  
732 binding (Pandey *et al.*, 2020). The PexRD54 work illustrates the importance of  
733 replication and follow-up experiments to the colP/MS. As with any biochemical assay,  
734 there is a benefit to experiment with different assay conditions, such as binding  
735 stringency.

736  
737 A subset of the host proteins we identified can be tagged as “usual suspects” that are  
738 unlikely to form biologically relevant interactions with the effectors (Petre *et al.*, 2015;  
739 Petre *et al.*, 2016). Nonetheless, 497 of the host interactors associated with no more  
740 than 4 out of the 14 effector families (Dataset 2). These relatively specific interactors  
741 are more likely to be biologically relevant compared to the more promiscuous proteins,  
742 which could include genuine “hubs” but are probably enriched in false positives (Petre  
743 *et al.*, 2015; Petre *et al.*, 2016). In total, six of the interactions we identified have been  
744 reported and analyzed in earlier studies (Table S1, Figure 1C). Indeed, as our follow-  
745 up analyses of the PexRD12/31 effector family demonstrate, the interactome network  
746 we generated can serve as a launchpad for studies of effector activities and the  
747 perturbations they cause in host plant cells. We therefore hope that this interactome  
748 dataset will complement previous screens of *P. infestans* RXLR effectors aimed at  
749 studying effector localization in the host and PTI suppressing activities (Zheng *et al.*,  
750 2014; Wang *et al.*, 2018) and serve as a useful community resource for functional  
751 effector biology studies.

752  
753 Classification of the host interactors into putative functional categories revealed over  
754 35 biological processes that are candidate effector-targeted processes (Table S2).  
755 The diversity of these processes is consistent with the view that *Phytophthora* RXLR  
756 effectors have evolved to modulate host pathways as diverse as immune signaling,  
757 gene silencing, and selective autophagy (Bos *et al.*, 2010; Qiao *et al.*, 2015; Dagdas  
758 *et al.*, 2016). However, the interactome network also illustrates a degree of convergent  
759 targeting of particular processes both within and between RXLR effector families.



760 Indeed, even though effectors can converge on a few “hub” host proteins (Song *et al.*,  
761 2009; Mukhtar *et al.*, 2011), one challenge is to understand how multiple effectors act  
762 on different steps of a host-targeted pathway (Win *et al.*, 2012b). A classic example of  
763 this concept can be observed in plant viruses, which encode several proteins that have  
764 evolved different mechanisms to suppress host RNA silencing rather than converging  
765 on a single host molecule (Burgyán and Havelda, 2011). In another example, *P.*  
766 *infestans* counteract apoplastic cysteine proteases by inhibiting host protease  
767 secretion via the RXLR effector AVRblb2 and by secreting protease inhibitors in the  
768 apoplast (Tian *et al.*, 2007; Bozkurt *et al.*, 2011). Indeed, the architecture of the  
769 interactome we generated indicates a certain degree of convergence between  
770 unrelated *P. infestans* effectors towards certain host processes.

771  
772 In light of the differences between the protein-protein interaction methods described  
773 above, it is relevant to note that we recovered relatively few transcription factors or  
774 nuclear proteins compared to yeast two-hybrid screens. This could be explained by  
775 the protein extraction protocol we used, which may have yielded a proteome relatively  
776 depleted in nuclear proteins (Howden and Huitema, 2012). On the other hand, our  
777 interactome was enriched in vesicle trafficking proteins possibly reflecting the value of  
778 having the effector baits expressed *in planta* in a cellular context that more closely  
779 mirrors dynamic cellular processes, such as endomembrane trafficking.

780  
781 During *P. infestans* infection, RXLR effectors are thought to be delivered inside  
782 haustoriated cells where they orchestrate cellular and molecular reprogramming of  
783 these plant cells, notably by modulating membrane trafficking (Bozkurt *et al.*, 2012;  
784 Dagdas *et al.*, 2016; Dagdas *et al.*, 2018). However, the mechanisms by which *P.*  
785 *infestans* RXLR effectors and other plant pathogen effectors block or hijack host  
786 membrane trafficking remain poorly understood. Several RXLR effectors, such as *P.*  
787 *infestans* AVRblb2 and AVR1, *Phytophthora palmivora* REX3, and *Phytophthora*  
788 *brassicae* RxLR24, prevent secretion of host proteins presumably to counteract focal  
789 immune responses in the host plant (Bozkurt *et al.*, 2011; Du *et al.*, 2015; Evangelisti  
790 *et al.*, 2017; Tomczynska *et al.*, 2018). Another *P. infestans* effector, PexRD54,  
791 stimulates and co-opts plant membrane trafficking by associating with the plant  
792 autophagy machinery at polarized foci in the haustorial interface (Dagdas *et al.*, 2018).  
793 PexRD54 was also recently proposed to connect small GTPase Rab8a vesicles with  
794 the autophagy machinery to stimulate formation of autophagosomes at the pathogen  
795 interface (Pandey *et al.*, 2020). In our host-interactor screen, we found that ten effector  
796 families associated with 32 proteins implicated in vesicle mediated transport (Figure  
797 2, Figure S3, Table S2). These results, along with our follow-up observation that  
798 members of the PexRD12/31 family associate with R-SNARE VAMP72 proteins and  
799 accumulate at the haustorial interface, further point to vesicular trafficking as a major  
800 target of oomycete effectors.

801  
802 PexRD12/31 effectors add to a growing list of perihaustral effectors that are  
803 associated with polarized markers at the *P. infestans* haustorial interface (Bozkurt and

804 Kamoun, 2020). We also discovered that the PexRD12/31 family of RXLR-WY  
805 effectors associate with 16 vesicle-trafficking *N. benthamiana* proteins in a relatively  
806 specific manner (Table S3). However, at this stage we did not determine which of  
807 these host proteins, including NbVAMP72x, directly bind the effectors. It remains  
808 possible that the PexRD12/31 effectors have the same direct host interactor and that  
809 the additional proteins discovered by colP/MS are part of a multiprotein complex  
810 targeted by these effectors. Nevertheless, PexRD12/31 effectors accumulate at the  
811 host plasma membrane and, therefore, could potentially co-localize with vesicle  
812 trafficking components at this subcellular location. In addition, the examined effectors  
813 focally accumulate at the EHM suggesting that they are associated with the dynamic  
814 membrane trafficking processes that take place in the infected haustoriated cells.  
815 PexRD31 stood out compared to the other examined effectors by labelling mobile  
816 vesicle-like puncta; and these PexRD31 vesicle-like structures were visualized in  
817 contact with the EHM (Figures 7-9). PexRD31 co-localized with the post-Golgi  
818 endosomal marker RabC1, but, unfortunately, the biology of RabC1 is unknown  
819 (Geldner *et al.*, 2009). Recently, VAPYRIN, a protein required for the intracellular  
820 establishment of arbuscular mycorrhizal fungi, was shown to co-localize with RabC1  
821 in small mobile structures (Bapaume *et al.*, 2019). Interestingly, VAPYRIN also  
822 interacts with a symbiotic R-SNARE of the VAMP72 family (Bapaume *et al.*, 2019).  
823 Therefore, VAPYRIN/RabC1 mobile bodies might mark an endosomal pathway  
824 associated with perimicrobial membranes of plant cells colonized by filamentous  
825 microbes. Future studies will determine whether the PexRD31 and VAPYRIN bodies  
826 form another example of common cellular structures formed by pathogens and  
827 symbionts during intracellular colonization of plant cells (Rey and Schornack, 2013).

828

829 We found that PexRD31 and *P. infestans* alter the number and the distribution of  
830 FYVE-labelled endosomes in leaves of *N. benthamiana*. How would a pathogen  
831 benefit by modulating FYVE-positive endosomes? The 2xFYVE-GFP marker labels  
832 vesicles enriched in the phosphoinositide lipid PI3P, notably late endosomes and  
833 multivesicular bodies of the late endocytic pathway (Robinson *et al.*, 2008; Gao *et al.*,  
834 2014). Our finding that *P. infestans* alters PI3P vesicles is consistent with previous  
835 reports that this pathogen perturbs plant endocytic trafficking, notably by redirecting  
836 this pathway to the EHM (Bozkurt *et al.*, 2015). Pathogen-induced modifications in  
837 host membrane phosphoinositide composition have recently been proposed both as  
838 a potential pathogen strategy to promote infection and as a host focal immune  
839 response (Rausche *et al.*, 2020). *P. infestans* may deploy effectors such as PexRD31  
840 to boost the late endocytic pathway, help recruit endomembranes for EHM biogenesis  
841 and counter host immunity. Another possibility is that PexRD31 blocks PI3P vesicle  
842 fusion to host membranes resulting in the accumulation of these vesicles in the  
843 cytosol. Further mechanistic studies of the dynamics of the late endocytic pathway  
844 during *P. infestans* infection should reveal the biological significance of the observed  
845 phenomenon.

846

847 *P. infestans* is an aggressive plant pathogen that continues to threaten global food  
848 security (Kamoun *et al.*, 2015). Our study adds to the *in planta* effectoromics screens  
849 that have been conducted with *P. infestans* RXLR effectors ever since the sequencing  
850 of this pathogen genome over 10 years ago (Haas *et al.*, 2009; Oh *et al.*, 2009; Pais  
851 *et al.*, 2013; Zheng *et al.*, 2014; Wang *et al.*, 2018). To date, high-throughput screens  
852 have focused primarily on assigning AVR activities to effectors, which helped guide  
853 the identification and characterization of matching plant immune receptors  
854 (Vleeshouwers *et al.*, 2008; Oh *et al.*, 2009; Rietman, 2011). The interactome network  
855 resource we have generated complements these earlier screens and should prove to  
856 be a valuable platform for functional studies of *P. infestans* effectors and the processes  
857 they target.

858

## 859 MATERIALS AND METHODS

### 860 Biological materials

861

862 We used *Escherichia coli* strain DH5 $\alpha$ , *Agrobacterium tumefaciens* strain GV3101  
863 (pMP90), and *Nicotiana benthamiana* as previously described (Petre *et al.*, 2015).  
864 Transgenic 2xFYVE-GFP *N. benthamiana* were obtained by transforming the plants  
865 with binary plasmid pBLTI221-2xFYVE-GFP (Voigt *et al.*, 2005). *P. infestans* isolates  
866 88069 and 88069td, expressing the red fluorescent marker tandem dimer RFP  
867 (tdTomato), were grown and used for *N. benthamiana* leaf infection as previously  
868 reported (Dagdaz *et al.*, 2016).

869

### 870 Plasmid construction

871

872 Molecular cloning and recombinant DNA manipulations were conducted using  
873 standard protocols. Primers and coding sequences of the fusion proteins used in this  
874 study are indicated in Table S4 and Table S5.

875

876 To generate FLAG-tagged protein fusions, we obtained DNA fragments matching the  
877 coding sequence of the effector domains by gene synthesis (GenScript, Piscataway,  
878 USA) including *PacI* and *NotI* restriction sites on 5' and 3' ends, respectively  
879 (Table S5). Through this process, the coding sequences were codon-optimized for  
880 expression in *N. benthamiana* and the N-termini (signal peptide and RXLR regions)  
881 were replaced by FLAG tag sequences. We then cloned the DNA fragments into the  
882 Tobacco mosaic virus-based *A. tumefaciens* binary vector pTRBO (Lindbo, 2007).

883

884 To generate fluorescent protein fusions, we obtained the coding sequence of effector  
885 domains by PCR amplification from genomic DNA of *P. infestans* isolate T30-4, using  
886 primers that included *BbsI* AATG/GCTT-compatible sites. DNA fragments were cloned  
887 into the Golden Gate level 0 vector pICSL41308 by digestion/ligation as previously

888 described (Petre *et al.*, 2015; Petre *et al.*, 2017) and verified by sequencing (GATC  
889 Biotech, Constance, Germany). DNA fragments were combined into a Golden Gate  
890 level 1 binary vector pICSL47742 in order to create a 'CaMV 35S  
891 promoter::fluorescent protein coding sequence::effector domain coding  
892 sequence::OCS terminator' expression unit.

893  
894 The following fluorescent markers were described previously: mitochondria (COX4<sub>1-</sub>  
895 <sub>29</sub>-GFP), peroxysomes (GFP-PTS1), Golgi apparatus (MAN1<sub>1-49</sub>-GFP), and ER  
896 (WAK2<sub>SP</sub>-GFP-HDEL) (Nelson *et al.*, 2007); phosphatidylinositol-3-phosphate (PI3P)-  
897 positive vesicles (2xFYVE-GFP) (Voigt, 2008); autophagosomes (GFP-ATG8C)  
898 (Dagdas *et al.*, 2016). We synthesized the coding sequence of *Arabidopsis thaliana*  
899 Exo70E2 (At5g61010) (GenScript) and assembled it with fluorescent proteins into  
900 plasmid vector pICH86988 as previously described (Petre *et al.*, 2015).

901  
902 GFP-NbVAMP72x was cloned using Gateway technology (Thermo Fisher Scientific,  
903 Waltham, USA) as follows. Coding sequence for NbVAMP72x was amplified by PCR  
904 using the primer pair NbVAMP72x\_F and NbVAMP72x\_R (Table S4), and Pfu taq  
905 polymerase (Takara, Mountain View, USA) from *N. benthamiana* cDNA made from  
906 total RNA extracted from 4 week-old *N. benthamiana* leaves. PCR was performed for  
907 35 cycles with denaturing at 96 °C for 30 s, annealing at 58 °C for 40 s and extension  
908 at 72 °C for 1 min for each cycle, followed by final extension at 72 °C for 10 min. The  
909 amplicon was cloned into pENTR (Thermo Fisher) using Topo TA cloning kit (Thermo  
910 Fisher). The insert was transferred to the destination vector pK7WGF2 by LR reaction  
911 using Gateway LR Clonase II Enzyme mix (Thermo Fisher) in frame with the coding  
912 sequence of GFP which was part of the vector. All Gateway cloning was performed  
913 following the manufacturer's instructions.

914

## 915 **Immunoblotting**

916

917 We performed immunoblot analyses on SDS-PAGE separated proteins as described  
918 elsewhere (Oh *et al.*, 2009). We used Monoclonal FLAG M2-alkaline phosphatase  
919 antibodies (Sigma-Aldrich, St-Louis, USA) at a 1:10,000 dilution and we developed  
920 blots using the AP conjugate substrate kit (Bio-Rad; Hercules, USA). We used  
921 polyclonal GFP antibodies (Thermo Fisher) at a 1:4,000 dilution as primary antibody,  
922 and anti-rabbit polyclonal antibody conjugated to horseradish peroxidase (Sigma-  
923 Aldrich, St-Louis, USA) as a secondary antibody at a 1:12,000 dilution. We detected  
924 protein band signals using ECL substrate (Thermo Fisher) following exposure on  
925 Amersham Hyperfilm ECL (GE Healthcare, Chicago, USA).

926

927

928

## 929 Coimmunoprecipitation assays

930

931 We performed anti-FLAG coIP/MS assays following a protocol previously described  
932 (Win *et al.*, 2011). Briefly, the strategy consisted of affinity purifying transiently  
933 expressed FLAG epitope tagged effector proteins and identifying the plant proteins  
934 associated with purified effectors by mass spectrometry (MS) (Figure S1). FLAG-  
935 tagged effector proteins were immunoprecipitated using agarose beads conjugated  
936 with anti-FLAG monoclonal antibodies. Bound effectors and associated plant proteins  
937 were competitively eluted by 3XFLAG peptides (Sigma-Aldrich, Dorsett, England) and  
938 separated by SDS-PAGE. Each lane from the gel was cut into strips, proteins were  
939 digested in gel with trypsin, and submitted for protein identification by MS. For spectral  
940 searches, we used a protein sequence database composed of two proteome  
941 predictions of *N. benthamiana* genome (Bombarely *et al.*, 2012): (i) proteome version  
942 0.44 available at the Sol Genomics Network (SGN, <http://solgenomics.net/>) and (ii)  
943 evidence-based proteome prediction made by The Genome Analysis Centre (TGAC)  
944 based on the same genome sequence. Identical sequences were removed from the  
945 combined database to create a non-redundant *N. benthamiana* proteome sequence  
946 database. Each sequence in the database was annotated with a top BLASTP hit (e-  
947 value cutoff  $1 \times 10^{-3}$ ) to SwissProt protein database if the search was successful. This  
948 annotated database was used for Mascot searches using the spectral collection from  
949 the mass spectrometry. Mascot results were analyzed using Scaffold (Proteome  
950 Software Inc., Oregon, USA). Presence of a protein in the analyzed samples were  
951 identified by having at least two peptide matches with equal or more than 95%  
952 probability and an ion score of equal or more than 40 in their matches. All protein hits  
953 fulfilling these criteria were exported from Scaffold program for further analysis. To  
954 reduce complexity of the dataset, we grouped the RXLR effectors into families as  
955 previously described (Boutemy *et al.*, 2011) based on their effector domains using a  
956 Markov clustering algorithm (MCL) (Enright *et al.*, 2002). To further reduce the  
957 complexity of the dataset, host protein interactors were also clustered if they shared  
958 (i) a minimum of 80% identity on 80% of their lengths, or (ii) the exact same annotation.  
959 Each cluster was represented by a single identifier for downstream analyses. Each  
960 plant protein identified in coIP/MS was annotated with Gene Ontology (GO) terms  
961 using Blast2Go program (Götz *et al.*, 2008).

962

963 For a subset of samples, we performed anti-GFP coIP/MS assays and subsequent  
964 analyses as previously reported (Win *et al.*, 2011; Petre *et al.*, 2015; Petre *et al.*, 2017),  
965 using GFP-Trap agarose beads (Chromotek, Munich, Germany), a hybrid mass  
966 spectrometer LTQ-Orbitrap XL (Thermo Fisher Scientific, Carlsbad, California, USA)  
967 and a nanoflow-UHPLC system (NanoAcquity Waters Corp., Burnsville, Minnesota,  
968 USA). However, to be more stringent during the immunoprecipitation process, we  
969 used extraction and immunoprecipitation buffers with 0.5 % IGEPAL and 400 mM  
970 NaCl. We performed two technical replicates for the trypsin digestion. For the first  
971 replicate, we followed the in-gel digestion protocol as previously reported (Petre *et al.*,  
972 2015). For the second replicate, we performed on-beads digestion as described

973 previously (Zess *et al.*, 2019). Both methods yielded similar results (Figure S9, Dataset  
974 3). We merged the total spectrum count values from the two technical replicates for  
975 the analyses shown in Table S3.  
976

## 977 **Sequence analyses**

978  
979 We obtained amino acid sequences of the PexRD12/31 family effectors from GenBank  
980 based on 'RxIRfam9' RXLR family reported in Haas *et al.* (2009). We removed  
981 identical sequences and pseudogenes from the family and collected 16 sequences in  
982 a database for further analysis (Figure 3). We used effector domain sequences (after  
983 'EER' residues, Figure 3) for multiple sequence alignment by MAFFT program using  
984 "--auto --reorder" options and L-INS-I strategy (Kato *et al.*, 2005). Multiple sequence  
985 alignment was performed with iterative refinement method (<16) with local pairwise  
986 alignment information using amino acid substitution matrix BLOSUM62, 1.53, with the  
987 amino acids colored according to the ClustalX scheme (Larkin *et al.*, 2007). The  
988 phylogenetic relationship within the PexRD12/31 family members was inferred using  
989 the Maximum Likelihood method and JTT matrix-based model (Jones *et al.*, 1992)  
990 implemented in MEGA X (Kumar *et al.*, 2018) with 1000 bootstraps. Sequence  
991 conservation profile was obtained using the WebLogo server  
992 (<http://weblogo.berkeley.edu>) (Crooks *et al.*, 2004). Secondary structure prediction  
993 was done using Jpred server (<http://www.compbio.dundee.ac.uk/jpred>) (Drozdetskiy  
994 *et al.*, 2015). WY-fold region was predicted based on the hidden Markov model (HMM)  
995 reported in Boutemy *et al.* (2011). HMMER v3.1b (Mistry *et al.*, 2013) was used to  
996 search the WY-fold HMM in amino acid sequences of PexRD12/31 family of effectors.  
997

998 The sequence of NbS00022342g0004 was searched against the *A. thaliana* proteome  
999 version Araport11 (The Arabidopsis Information Resource (TAIR),  
1000 <https://www.arabidopsis.org>) using BLASTP (BLAST 2.9.0+) (Altschul *et al.*, 1997) as  
1001 provided by TAIR server. To attempt to identify an ortholog of NbS00022342g0004 in  
1002 *A. thaliana*, we extracted all AtVAMP72 family (AtVAMP721-727) from Araport11 and  
1003 14 VAMP72-like amino acid sequences from the proteome of *N. benthamiana* (Sol  
1004 Genomics Network, version 0.44). Multiple Sequence alignment was performed with  
1005 MAFFT program using "--auto --reorder" options and L-INS-I strategy (Kato *et al.*,  
1006 2005). Phylogeny was inferred by using the Maximum Likelihood method and JTT  
1007 matrix-based model implemented in MEGA X (Kumar *et al.*, 2018). Initial tree(s) for  
1008 the heuristic search were obtained automatically by applying Neighbor-Join and BioNJ  
1009 algorithms to a matrix of pairwise distances estimated using the JTT model, and then  
1010 selecting the topology with superior log likelihood value after 1000 bootstraps.

1011  
1012  
1013

## 1014 **Laser-scanning confocal microscopy**

1015

1016 We collected leaves of *N. benthamiana* three days post agroinfiltration and  
1017 immediately performed live-cell imaging with a Leica DM6000B/TCS SP5 laser-  
1018 scanning confocal microscope (Leica microsystems, Bucks, UK), using a 63x water  
1019 immersion objective as previously described (Petre *et al.*, 2015). We used the  
1020 following settings for excitation/collection of fluorescence: GFP (488/505-525 nm),  
1021 chlorophyll (488/680-700 nm), and mCherry (561/580-620 nm). We performed image  
1022 analysis with Fiji (<http://fiji.sc/Fiji>).

1023

## 1024 **Quantification of FYVE endosomes in transient assays**

1025

1026 To quantify the 2xFYVE-GFP puncta in confocal images acquired from *N.*  
1027 *benthamiana* leaf cells transiently expressing different mCherry or RFP-fused  
1028 constructs, we built a pipeline using the ImageJ package Fiji (Schindelin *et al.*, 2012).  
1029 We split the channels (GFP, RFP, and bright field) and considered only the GFP  
1030 channel. We then smoothed the images with the Smooth tool. Third, we performed an  
1031 auto threshold using the RenyiEntropy parameter. Finally, we counted the puncta per  
1032 image with the Analyze particles tool, with the following settings: size = 0.07 – 5;  
1033 circularity = 0.3 – 1. In parallel, we calculated an estimate of the area of cytoplasm  
1034 using the total GFP signal in the image. To do this, we first applied the gaussian blur  
1035 tool with a Sigma = 5. We then applied the Threshold function using the Huang white  
1036 method. After that, we obtained the area of cytoplasm using the Measure tool. The  
1037 number of GFP puncta calculated in every image was divided by the total area of  
1038 cytoplasm calculated, obtaining the number of GFP labelled puncta/ $\mu\text{m}^2$  of cytoplasm.  
1039 We then exported the quantification results in a spreadsheet and generated the  
1040 scatterplot using R.

1041

1042 For the quantification of 2xFYVE-GFP puncta in confocal images acquired from *N.*  
1043 *benthamiana* leaf cells transiently expressing FLAG-tagged *Phytophthora* effectors  
1044 and free RFP, a different automated pipeline was employed, as described in (Salomon  
1045 *et al.*, 2010).

1046

## 1047 **Quantitative analysis of confocal images during *P. infestans* leaf colonization**

1048

1049 To quantify the 2xFYVE-GFP puncta in confocal images acquired on *N. benthamiana*  
1050 leaf cells colonized by *P. infestans* isolate 88069td, we built a four-step analytical  
1051 pipeline using the ImageJ package Fiji (Schindelin *et al.*, 2012). First, we split the  
1052 channels (GFP, RFP, chlorophyll, and bright field) and considered only the GFP  
1053 channel. Second, we smoothed the images with the Smooth tool. Third, we performed  
1054 an auto threshold using the RenyiEntropy parameter. Finally, we counted the puncta

1055 per image with the Analyze particles tool, with the following settings: size = 0.5 –  
1056 infinity; circularity = 0.5 – 1. To quantify the presence of *P. infestans* isolate 88069td  
1057 on *N. benthamiana* leaves, we adapted the first and last steps of the pipeline  
1058 abovementioned as follow: for the first step, we considered the RFP channel, and for  
1059 the fourth step, we used the default settings for particle size and circularity, i.e. 0 –  
1060 infinity and 0 – 1, respectively. We then exported the quantification results in a  
1061 spreadsheet and generated the scatterplot using R (R Core Team, 2019).  
1062

### 1063 **Data availability and accession numbers**

1064  
1065 GenBank accession numbers for the effectors used in this study are presented in  
1066 Table 1. The Solanaceae Genomics Network (<https://solgenomics.net>) accession  
1067 numbers for *N. benthamiana* proteins are listed in Dataset 1.  
1068

1069 The mass spectrometry proteomics data were deposited to the ProteomeXchange  
1070 Consortium via the PRIDE (Perez-Riverol *et al.*, 2019) partner repository  
1071 (<https://www.ebi.ac.uk/pride/archive>) with the dataset identifier PXD020751 and  
1072 10.6019/PXD020751.  
1073

### 1074 **ACKNOWLEDGEMENTS**

1075  
1076 We are thankful to several colleagues for discussions and ideas. Over the course of  
1077 this research project, the Kamoun Lab was funded primarily from the Gatsby  
1078 Charitable Foundation, Biotechnology and Biological Sciences Research Council  
1079 (BBSRC, UK), and European Research Council (ERC; NGRB and BLASTOFF  
1080 projects).  
1081



1082 **References**

- 1083
- 1084 **Alfano, J.R.** (2009). Roadmap for future research on plant pathogen effectors. *Molecular plant*
- 1085 *pathology* **10**, 805-813.
- 1086 **Altschul, S.F., Madden, T.L., Schäffer, A.A., Zhang, J., Zhang, Z., Miller, W., and Lipman,**
- 1087 **D.J.** (1997). Gapped BLAST and PSI-BLAST: a new generation of protein database
- 1088 search programs. *Nucleic Acids Res.* **25**, 3389-3402.
- 1089 **Anderson, R.G., Deb, D., Fedkenheuer, K., and McDowell, J.M.** (2015). Recent progress
- 1090 in RXLR effector research. *Molecular Plant-Microbe Interactions* **28**, 1063-1072.
- 1091 **Asai, S., and Shirasu, K.** (2015). Plant cells under siege: plant immune system versus
- 1092 pathogen effectors. *Current opinion in plant biology* **28**, 1-8.
- 1093 **Bapaume, L., Laukamm, S., Darbon, G., Monney, C., Meyenhofer, F., Feddermann, N.,**
- 1094 **Chen, M., and Reinhardt, D.** (2019). VAPYRIN marks an endosomal trafficking
- 1095 compartment involved in arbuscular mycorrhizal symbiosis. *Frontiers in plant science* **10**,
- 1096 666.
- 1097 **Boevink, P.C., Wang, X., McLellan, H., He, Q., Naqvi, S., Armstrong, M.R., Zhang, W.,**
- 1098 **Hein, I., Gilroy, E.M., and Tian, Z.** (2016). A *Phytophthora infestans* RXLR effector
- 1099 targets plant PP1c isoforms that promote late blight disease. *Nature communications* **7**,
- 1100 1-14.
- 1101 **Bombarely, A., Rosli, H.G., Vrebalov, J., Moffett, P., Mueller, L.A., and Martin, G.B.**
- 1102 (2012). A draft genome sequence of *Nicotiana benthamiana* to enhance molecular plant-
- 1103 microbe biology research. *Molecular Plant-Microbe Interactions* **25**, 1523-1530.
- 1104 **Bos, J.I., Armstrong, M.R., Gilroy, E.M., Boevink, P.C., Hein, I., Taylor, R.M., Zhendong,**
- 1105 **T., Engelhardt, S., Vetukuri, R.R., and Harrower, B.** (2010). *Phytophthora infestans*
- 1106 effector AVR3a is essential for virulence and manipulates plant immunity by stabilizing
- 1107 host E3 ligase CMPG1. *Proceedings of the National Academy of Sciences* **107**, 9909-
- 1108 9914.
- 1109 **Boutemy, L.S., King, S.R., Win, J., Hughes, R.K., Clarke, T.A., Blumenschein, T.M.,**
- 1110 **Kamoun, S., and Banfield, M.J.** (2011). Structures of *Phytophthora* RXLR effector
- 1111 proteins a conserved but adaptable fold underpins functional diversity. *Journal of*
- 1112 *Biological Chemistry* **286**, 35834-35842.
- 1113 **Bozkurt, T.O., and Kamoun, S.** (2020). The plant–pathogen haustorial interface at a glance.
- 1114 *Journal of Cell Science* **133**.
- 1115 **Bozkurt, T.O., Schornack, S., Banfield, M.J., and Kamoun, S.** (2012). Oomycetes,
- 1116 effectors, and all that jazz. *Current opinion in plant biology* **15**, 483-492.
- 1117 **Bozkurt, T.O., Belhaj, K., Dagdas, Y.F., Chaparro-Garcia, A., Wu, C.H., Cano, L.M., and**
- 1118 **Kamoun, S.** (2015). Rerouting of plant late endocytic trafficking toward a pathogen
- 1119 interface. *Traffic* **16**, 204-226.
- 1120 **Bozkurt, T.O., Schornack, S., Win, J., Shindo, T., Ilyas, M., Oliva, R., Cano, L.M., Jones,**
- 1121 **A.M., Huitema, E., van der Hoorn, R.A., and Kamoun, S.** (2011). *Phytophthora*
- 1122 *infestans* effector AVRblb2 prevents secretion of a plant immune protease at the
- 1123 haustorial interface. *Proceedings of the National Academy of Sciences* **108**, 20832-
- 1124 20837.
- 1125 **Burgyán, J., and Havelda, Z.** (2011). Viral suppressors of RNA silencing. *Trends Plant Sci.*
- 1126 **16**, 265-272.
- 1127 **Chaparro-Garcia, A., Schwizer, S., Sklenar, J., Yoshida, K., Petre, B., Bos, J.I.,**
- 1128 **Schornack, S., Jones, A.M., Bozkurt, T.O., and Kamoun, S.** (2015). *Phytophthora*
- 1129 *infestans* RXLR-WY effector AVR3a associates with dynamin-related protein 2 required
- 1130 for endocytosis of the plant pattern recognition receptor FLS2. *PLoS One* **10**, e0137071.
- 1131 **Collins, N.C., Thordal-Christensen, H., Lipka, V., Bau, S., Kombrink, E., Qiu, J.-L.,**
- 1132 **Hückelhoven, R., Stein, M., Freialdenhoven, A., and Somerville, S.C.** (2003). SNARE-
- 1133 protein-mediated disease resistance at the plant cell wall. *Nature* **425**, 973-977.
- 1134 **Cooke, D.E.L., Cano, L.M., Raffaele, S., Bain, R.A., Cooke, L.R., Etherington, G.J., Deahl,**
- 1135 **K.L., Farrer, R.A., Gilroy, E.M., Goss, E.M., Grünwald, N.J., Hein, I., MacLean, D.,**

- 1136 **McNicol, J.W., Randall, E., Oliva, R.F., Pel, M.A., Shaw, D.S., Squires, J.N., Taylor,**  
1137 **M.C., Vleeshouwers, V.G.A.A., Birch, P.R.J., Lees, A.K., and Kamoun, S.** (2012).  
1138 Genome Analyses of an Aggressive and Invasive Lineage of the Irish Potato Famine  
1139 Pathogen. *PLOS Pathogens* **8**, e1002940.
- 1140 **Crooks, G.E., Hon, G., Chandonia, J.-M., and Brenner, S.E.** (2004). WebLogo: a sequence  
1141 logo generator. *Genome Res.* **14**, 1188-1190.
- 1142 **Dagdas, Y.F., Pandey, P., Tumtas, Y., Sanguankiattichai, N., Belhaj, K., Duggan, C.,**  
1143 **Leary, A.Y., Segretin, M.E., Contreras, M.P., Savage, Z., Khandare, V.S., Kamoun,**  
1144 **S., and Bozkurt, T.O.** (2018). Host autophagy machinery is diverted to the pathogen  
1145 interface to mediate focal defense responses against the Irish potato famine pathogen.  
1146 *Elife* **7**.
- 1147 **Dagdas, Y.F., Belhaj, K., Maqbool, A., Chaparro-Garcia, A., Pandey, P., Petre, B.,**  
1148 **Tabassum, N., Cruz-Mireles, N., Hughes, R.K., Sklenar, J., Win, J., Menke, F.,**  
1149 **Findlay, K., Banfield, M.J., Kamoun, S., and Bozkurt, T.O.** (2016). An effector of the  
1150 Irish potato famine pathogen antagonizes a host autophagy cargo receptor. *Elife* **5**,  
1151 e10856.
- 1152 **Derevnina, L., Kamoun, S., and Wu, C.h.** (2019). Dude, where is my mutant? *Nicotiana*  
1153 *benthamiana* meets forward genetics. *New Phytologist* **221**, 607-610.
- 1154 **Derevnina, L., Petre, B., Kellner, R., Dagdas, Y.F., Sarowar, M.N., Giannakopoulou, A.,**  
1155 **De la Concepcion, J.C., Chaparro-Garcia, A., Pennington, H.G., Van West, P., and**  
1156 **Kamoun, S.** (2016). Emerging oomycete threats to plants and animals. *Philosophical*  
1157 *Transactions of the Royal Society B: Biological Sciences* **371**, 20150459.
- 1158 **Dodds, P.N., and Rathjen, J.P.** (2010). Plant immunity: towards an integrated view of plant-  
1159 pathogen interactions. *Nat Rev Genet* **11**, 539-548.
- 1160 **Drozdetskiy, A., Cole, C., Procter, J., and Barton, G.J.** (2015). JPred4: a protein secondary  
1161 structure prediction server. *Nucleic Acids Res.* **43**, W389-W394.
- 1162 **Du, Y., Mpina, M.H., Birch, P.R., Bouwmeester, K., and Govers, F.** (2015). *Phytophthora*  
1163 *infestans* RXLR effector AVR1 interacts with exocyst component Sec5 to manipulate plant  
1164 immunity. *Plant Physiology* **169**, 1975-1990.
- 1165 **Enright, A.J., Van Dongen, S., and Ouzounis, C.A.** (2002). An efficient algorithm for large-  
1166 scale detection of protein families. *Nucleic acids research* **30**, 1575-1584.
- 1167 **Evangelisti, E., Gogleva, A., Hainaux, T., Doumane, M., Tulin, F., Quan, C., Yunusov, T.,**  
1168 **Floch, K., and Schornack, S.** (2017). Time-resolved dual transcriptomics reveal early  
1169 induced *Nicotiana benthamiana* root genes and conserved infection-promoting  
1170 *Phytophthora palmivora* effectors. *BMC Biol.* **15**, 39.
- 1171 **Fisher, M.C., Henk, D.A., Briggs, C.J., Brownstein, J.S., Madoff, L.C., McCraw, S.L., and**  
1172 **Gurr, S.J.** (2012). Emerging fungal threats to animal, plant and ecosystem health. *Nature*  
1173 **484**, 186-194.
- 1174 **Gao, C., Luo, M., Zhao, Q., Yang, R., Cui, Y., Zeng, Y., Xia, J., and Jiang, L.** (2014). A  
1175 unique plant ESCRT component, FREE1, regulates multivesicular body protein sorting  
1176 and plant growth. *Curr. Biol.* **24**, 2556-2563.
- 1177 **Gawehns, F., Cornelissen, B.J., and Takken, F.L.** (2013). The potential of effector-target  
1178 genes in breeding for plant innate immunity. *Microbial biotechnology* **6**, 223-229.
- 1179 **Geldner, N., Dénervaud-Tendon, V., Hyman, D.L., Mayer, U., Stierhof, Y.D., and Chory,**  
1180 **J.** (2009). Rapid, combinatorial analysis of membrane compartments in intact plants with  
1181 a multicolor marker set. *The Plant Journal* **59**, 169-178.
- 1182 **Giannakopoulou, A., Schornack, S., Bozkurt, T.O., Haart, D., Ro, D.-K., Faraldos, J.A.,**  
1183 **Kamoun, S., and O'Maille, P.E.** (2014). Variation in capsid sensitivity between  
1184 *Phytophthora infestans* and *Phytophthora capsici* is consistent with their host range. *PLoS*  
1185 *One* **9**.
- 1186 **Goodin, M.M., Zaitlin, D., Naidu, R.A., and Lommel, S.A.** (2008). *Nicotiana benthamiana*:  
1187 its history and future as a model for plant-pathogen interactions. *Mol. Plant-Microbe*  
1188 *Interact.* **21**, 1015-1026.

- 1189 **Götz, S., García-Gómez, J.M., Terol, J., Williams, T.D., Nagaraj, S.H., Nueda, M.J.,**  
1190 **Robles, M., Talón, M., Dopazo, J., and Conesa, A.** (2008). High-throughput functional  
1191 annotation and data mining with the Blast2GO suite. *Nucleic Acids Res.* **36**, 3420-3435.
- 1192 **Haas, B.J., Kamoun, S., Zody, M.C., Jiang, R.H., Handsaker, R.E., Cano, L.M., Grabherr,**  
1193 **M., Kodira, C.D., Raffaele, S., Torto-Alalibo, T., Bozkurt, T.O., Ah-Fong, A.M.,**  
1194 **Alvarado, L., Anderson, V.L., Armstrong, M.R., Avrova, A., Baxter, L., Beynon, J.,**  
1195 **Boevink, P.C., Bollmann, S.R., Bos, J.I., Bulone, V., Cai, G., Cakir, C., Carrington,**  
1196 **J.C., Chawner, M., Conti, L., Costanzo, S., Ewan, R., Fahlgren, N., Fischbach, M.A.,**  
1197 **Fugelstad, J., Gilroy, E.M., Gnerre, S., Green, P.J., Grenville-Briggs, L.J., Griffith, J.,**  
1198 **Grunwald, N.J., Horn, K., Horner, N.R., Hu, C.H., Huitema, E., Jeong, D.H., Jones,**  
1199 **A.M., Jones, J.D., Jones, R.W., Karlsson, E.K., Kunjeti, S.G., Lamour, K., Liu, Z., Ma,**  
1200 **L., Maclean, D., Chibucos, M.C., McDonald, H., McWalters, J., Meijer, H.J., Morgan,**  
1201 **W., Morris, P.F., Munro, C.A., O'Neill, K., Ospina-Giraldo, M., Pinzon, A., Pritchard,**  
1202 **L., Ramsahoye, B., Ren, Q., Restrepo, S., Roy, S., Sadanandom, A., Savidor, A.,**  
1203 **Schorneck, S., Schwartz, D.C., Schumann, U.D., Schwessinger, B., Seyer, L.,**  
1204 **Sharpe, T., Silvar, C., Song, J., Studholme, D.J., Sykes, S., Thines, M., van de**  
1205 **Vondervoort, P.J., Phuntumart, V., Wawra, S., Weide, R., Win, J., Young, C., Zhou,**  
1206 **S., Fry, W., Meyers, B.C., van West, P., Ristaino, J., Govers, F., Birch, P.R., Whisson,**  
1207 **S.C., Judelson, H.S., and Nusbaum, C.** (2009). Genome sequence and analysis of the  
1208 Irish potato famine pathogen *Phytophthora infestans*. *Nature* **461**, 393-398.
- 1209 **He, J., Ye, W., Choi, D.S., Wu, B., Zhai, Y., Guo, B., Duan, S., Wang, Y., Gan, J., and Ma,**  
1210 **W.** (2019). Structural analysis of *Phytophthora* suppressor of RNA silencing 2 (PSR2)  
1211 reveals a conserved modular fold contributing to virulence. *Proceedings of the National*  
1212 *Academy of Sciences* **116**, 8054-8059.
- 1213 **Heard, W., Sklenář, J., Tome, D.F., Robatzek, S., and Jones, A.M.** (2015). Identification of  
1214 regulatory and cargo proteins of endosomal and secretory pathways in *Arabidopsis*  
1215 *thaliana* by proteomic dissection. *Molecular & Cellular Proteomics* **14**, 1796-1813.
- 1216 **Howden, A.J.M., and Huitema, E.** (2012). Effector-triggered post-translational modifications  
1217 and their role in suppression of plant immunity. *Frontiers in plant science* **3**, 160.
- 1218 **Ivanov, S., Austin, J., Berg, R.H., and Harrison, M.J.** (2019). Extensive membrane systems  
1219 at the host–arbuscular mycorrhizal fungus interface. *Nature Plants* **5**, 194-203.
- 1220 **Jiang, R.H., Tripathy, S., Govers, F., and Tyler, B.M.** (2008). RXLR effector reservoir in two  
1221 *Phytophthora* species is dominated by a single rapidly evolving superfamily with more  
1222 than 700 members. *Proceedings of the National Academy of Sciences* **105**, 4874-4879.
- 1223 **Jones, D.T., Taylor, W.R., and Thornton, J.M.** (1992). The rapid generation of mutation data  
1224 matrices from protein sequences. *Bioinformatics* **8**, 275-282.
- 1225 **Kamoun, S., Furzer, O., Jones, J.D.G., Judelson, H.S., Ali, G.S., Dalio, R.J.D., Roy, S.G.,**  
1226 **Schena, L., Zambounis, A., Panabières, F., Cahill, D., Ruocco, M., Figueiredo, A.,**  
1227 **Chen, X.-R., Hulvey, J., Stam, R., Lamour, K., Gijzen, M., Tyler, B.M., Grünwald, N.J.,**  
1228 **Mukhtar, M.S., Tomé, D.F.A., Tör, M., Van Den Ackerveken, G., McDowell, J., Daayf,**  
1229 **F., Fry, W.E., Lindqvist-Kreuzer, H., Meijer, H.J.G., Petre, B., Ristaino, J., Yoshida,**  
1230 **K., Birch, P.R.J., and Govers, F.** (2015). The Top 10 oomycete pathogens in molecular  
1231 plant pathology. *Mol. Plant Pathol.* **16**, 413-434.
- 1232 **Katoh, K., Kuma, K.-i., Toh, H., and Miyata, T.** (2005). MAFFT version 5: improvement in  
1233 accuracy of multiple sequence alignment. *Nucleic Acids Res.* **33**, 511-518.
- 1234 **Kumar, S., Stecher, G., Li, M., Knyaz, C., and Tamura, K.** (2018). MEGA X: molecular  
1235 evolutionary genetics analysis across computing platforms. *Mol. Biol. Evol.* **35**, 1547-  
1236 1549.
- 1237 **Kwon, C., Neu, C., Pajonk, S., Yun, H.S., Lipka, U., Humphry, M., Bau, S., Straus, M.,**  
1238 **Kwaaitaal, M., Rampelt, H., Kasmi, F.E., Jürgens, G., Parker, J., Panstruga, R., Lipka,**  
1239 **V., and Schulze-Lefert, P.** (2008). Co-option of a default secretory pathway for plant  
1240 immune responses. *Nature* **451**, 835-840.
- 1241 **Larkin, M.A., Blackshields, G., Brown, N.P., Chenna, R., McGettigan, P.A., McWilliam,**  
1242 **H., Valentin, F., Wallace, I.M., Wilm, A., and Lopez, R.** (2007). Clustal W and Clustal X  
1243 version 2.0. *Bioinformatics* **23**, 2947-2948.

- 1244 **Lee, A.H.Y., Petre, B., and Joly, D.L.** (2013). Effector wisdom. *New Phytologist* **197**, 375-  
1245 377.
- 1246 **Lee, S.-J., and Rose, J.K.C.** (2010). Mediation of the transition from biotrophy to necrotrophy  
1247 in hemibiotrophic plant pathogens by secreted effector proteins. *Plant Signaling &*  
1248 *Behavior* **5**, 769-772.
- 1249 **Lindbo, J.A.** (2007). TRBO: a high-efficiency tobacco mosaic virus RNA-based  
1250 overexpression vector. *Plant physiology* **145**, 1232-1240.
- 1251 **Lu, Y.J., Schornack, S., Spallek, T., Geldner, N., Chory, J., Schellmann, S., Schumacher,**  
1252 **K., Kamoun, S., and Robatzek, S.** (2012). Patterns of plant subcellular responses to  
1253 successful oomycete infections reveal differences in host cell reprogramming and  
1254 endocytic trafficking. *Cellular microbiology* **14**, 682-697.
- 1255 **Maqbool, A., Hughes, R.K., Dagdas, Y.F., Tregidgo, N., Zess, E., Belhaj, K., Round, A.,**  
1256 **Bozkurt, T.O., Kamoun, S., and Banfield, M.J.** (2016). Structural Basis of Host  
1257 Autophagy-related Protein 8 (ATG8) Binding by the Irish Potato Famine Pathogen  
1258 Effector Protein PexRD54. *J Biol Chem* **291**, 20270-20282.
- 1259 **Mellacheruvu, D., Wright, Z., Couzens, A.L., Lambert, J.-P., St-Denis, N.A., Li, T., Miteva,**  
1260 **Y.V., Hauri, S., Sardi, M.E., Low, T.Y., Halim, V.A., Bagshaw, R.D., Hubner, N.C., al-**  
1261 **Hakim, A., Bouchard, A., Faubert, D., Fermin, D., Dunham, W.H., Goudreault, M., Lin,**  
1262 **Z.-Y., Badillo, B.G., Pawson, T., Durocher, D., Coulombe, B., Aebersold, R., Superti-**  
1263 **Furga, G., Colinge, J., Heck, A.J.R., Choi, H., Gstaiger, M., Mohammed, S., Cristea,**  
1264 **I.M., Bennett, K.L., Washburn, M.P., Raught, B., Ewing, R.M., Gingras, A.-C., and**  
1265 **Nesvizhskii, A.I.** (2013). The CRAPome: a contaminant repository for affinity  
1266 purification–mass spectrometry data. *Nature Methods* **10**, 730-736.
- 1267 **Mistry, J., Finn, R.D., Eddy, S.R., Bateman, A., and Punta, M.** (2013). Challenges in  
1268 homology search: HMMER3 and convergent evolution of coiled-coil regions. *Nucleic*  
1269 *Acids Res.* **41**, e121-e121.
- 1270 **Mukhtar, M.S., Carvunis, A.-R., Dreze, M., Epple, P., Steinbrenner, J., Moore, J., Tasan,**  
1271 **M., Galli, M., Hao, T., and Nishimura, M.T.** (2011). Independently evolved virulence  
1272 effectors converge onto hubs in a plant immune system network. *science* **333**, 596-601.
- 1273 **Nelson, B., Cai, X., and Nebenführ, A.** (2007). A multi-color set of in vivo organelle markers  
1274 for colocalization studies in organelle markers for co-localisation studies in Arabidopsis  
1275 and other plants: Fluorescent organelle markers. (*Plant J.*), pp. 1126-1136.
- 1276 **Oh, S.-K., Young, C., Lee, M., Oliva, R., Bozkurt, T.O., Cano, L.M., Win, J., Bos, J.I., Liu,**  
1277 **H.-Y., van Damme, M., Morgan, W., Choi, D., Van der Vossen, E.A.G., Vleeshouwers,**  
1278 **V.G.A.A., and Kamoun, S.** (2009). In planta expression screens of *Phytophthora*  
1279 *infestans* RXLR effectors reveal diverse phenotypes, including activation of the *Solanum*  
1280 *bulbocastanum* disease resistance protein Rpi-blb2. *The Plant Cell* **21**, 2928-2947.
- 1281 **Oliveira-Garcia, E., and Valent, B.** (2015). How eukaryotic filamentous pathogens evade  
1282 plant recognition. *Current opinion in microbiology* **26**, 92-101.
- 1283 **Pais, M., Win, J., Yoshida, K., Etherington, G.J., Cano, L.M., Raffaele, S., Banfield, M.J.,**  
1284 **Jones, A., Kamoun, S., and Saunders, D.G.** (2013). From pathogen genomes to host  
1285 plant processes: the power of plant parasitic oomycetes. *Genome biology* **14**, 211.
- 1286 **Pais, M., Yoshida, K., Giannakopoulou, A., Pel, M.A., Cano, L.M., Oliva, R.F., Witek, K.,**  
1287 **Lindqvist-Kreuze, H., Vleeshouwers, V.G., and Kamoun, S.** (2018). Gene expression  
1288 polymorphism underpins evasion of host immunity in an asexual lineage of the Irish potato  
1289 famine pathogen. *BMC Evol. Biol.* **18**, 93.
- 1290 **Pandey, P., Leary, A.Y., Tümtas, Y., Savage, Z., Dagvadorj, B., Tan, E., Khandare, V.,**  
1291 **Duggan, C., Yusunov, T., Madalinski, M., Mirkin, F.G., Schornack, S., Dagdas, Y.,**  
1292 **Kamoun, S., and Bozkurt, T.O.** (2020). The Irish potato famine pathogen subverts host  
1293 vesicle trafficking to channel starvation-induced autophagy to the pathogen interface.  
1294 *bioRxiv*, 2020.03.20.000117.
- 1295 **Perez-Riverol, Y., Csordas, A., Bai, J., Bernal-Llinares, M., Hewapathirana, S., Kundu,**  
1296 **D.J., Inuganti, A., Griss, J., Mayer, G., and Eisenacher, M.** (2019). The PRIDE  
1297 database and related tools and resources in 2019: improving support for quantification  
1298 data. *Nucleic Acids Res.* **47**, D442-D450.

- 1299 **Petre, B., Win, J., Menke, F.L.H., and Kamoun, S.** (2017). Protein-Protein Interaction Assays  
1300 with Effector-GFP Fusions in *Nicotiana benthamiana*. *Methods Mol Biol* **1659**, 85-98.
- 1301 **Petre, B., Saunders, D.G., Sklenar, J., Lorrain, C., Win, J., Duplessis, S., and Kamoun,**  
1302 **S.** (2015). Candidate effector proteins of the rust pathogen *Melampsora larici-populina*  
1303 target diverse plant cell compartments. *Molecular Plant-Microbe Interactions* **28**, 689-700.
- 1304 **Petre, B., Saunders, D.G., Sklenar, J., Lorrain, C., Krasileva, K.V., Win, J., Duplessis, S.,**  
1305 **and Kamoun, S.** (2016). Heterologous Expression Screens in *Nicotiana benthamiana*  
1306 Identify a Candidate Effector of the Wheat Yellow Rust Pathogen that Associates with  
1307 Processing Bodies. *PLoS One* **11**, e0149035.
- 1308 **Qiao, Y., Shi, J., Zhai, Y., Hou, Y., and Ma, W.** (2015). Phytophthora effector targets a novel  
1309 component of small RNA pathway in plants to promote infection. *Proceedings of the*  
1310 *National Academy of Sciences* **112**, 5850-5855.
- 1311 **Rausche, J., Stenzel, I., Stauder, R., Fratini, M., Trujillo, M., Heilmann, I., and Rosahl, S.**  
1312 (2020). A phosphoinositide 5-phosphatase from *Solanum tuberosum* is activated by  
1313 PAMP-treatment and may antagonize phosphatidylinositol 4, 5-bisphosphate at  
1314 *Phytophthora infestans* infection sites. *New Phytol.*
- 1315 **R Core Team** (2020). R: A language environment for statistical computing. R Foundation for  
1316 Statistical Computing, Vienna, Austria. URL <http://www.R-project.org/>.
- 1317
- 1318 **Ren, Y., Armstrong, M., Qi, Y., McLellan, H., Zhong, C., Du, B., Birch, P.R., and Tian, Z.**  
1319 (2019). *Phytophthora infestans* RXLR effectors target parallel steps in an immune signal  
1320 transduction pathway. *Plant Physiol.* **180**, 2227-2239.
- 1321 **Rey, T., and Schornack, S.** (2013). Interactions of beneficial and detrimental root-colonizing  
1322 filamentous microbes with plant hosts. *Genome biology* **14**, 121.
- 1323 **Rietman, H.** (2011). Putting the *Phytophthora infestans* genome sequence at work: multiple  
1324 novel avirulence and potato resistance gene candidates revealed.
- 1325 **Robinson, D.G., Jiang, L., and Schumacher, K.** (2008). The endosomal system of plants:  
1326 charting new and familiar territories. *Plant Physiol.* **147**, 1482-1492.
- 1327 **Rovenich, H., Boshoven, J.C., and Thomma, B.P.** (2014). Filamentous pathogen effector  
1328 functions: of pathogens, hosts and microbiomes. *Current opinion in plant biology* **20**, 96-  
1329 103.
- 1330 **Salomon, S., Grunewald, D., Stüber, K., Schaaf, S., MacLean, D., Schulze-Lefert, P., and**  
1331 **Robatzek, S.** (2010). High-throughput confocal imaging of intact live tissue enables  
1332 quantification of membrane trafficking in *Arabidopsis*. *Plant Physiol.* **154**, 1096-1104.
- 1333 **Saunders, D.G., Breen, S., Win, J., Schornack, S., Hein, I., Bozkurt, T.O., Champouret,**  
1334 **N., Vleeshouwers, V.G., Birch, P.R., Gilroy, E.M., and Kamoun, S.** (2012). Host protein  
1335 BSL1 associates with *Phytophthora infestans* RXLR effector AVR2 and the *Solanum*  
1336 *demissum* immune receptor R2 to mediate disease resistance. *The Plant Cell* **24**, 3420-  
1337 3434.
- 1338 **Schindelin, J., Arganda-Carreras, I., Frise, E., Kaynig, V., Longair, M., Pietzsch, T.,**  
1339 **Preibisch, S., Rueden, C., Saalfeld, S., and Schmid, B.** (2012). Fiji: an open-source  
1340 platform for biological-image analysis. *Nature methods* **9**, 676-682.
- 1341 **Sharpee, W.C., and Dean, R.A.** (2016). Form and function of fungal and oomycete effectors.  
1342 *Fungal Biology Reviews* **30**, 62-73.
- 1343 **Song, J., Win, J., Tian, M., Schornack, S., Kaschani, F., Ilyas, M., van der Hoorn, R.A.L.,**  
1344 **and Kamoun, S.** (2009). Apoplastic effectors secreted by two unrelated eukaryotic plant  
1345 pathogens target the tomato defense protease Rcr3. *Proceedings of the National*  
1346 *Academy of Sciences* **106**, 1654-1659.
- 1347 **Tian, M., Win, J., Song, J., van der Hoorn, R., van der Knaap, E., and Kamoun, S.** (2007).  
1348 A *Phytophthora infestans* cystatin-like protein targets a novel tomato papain-like  
1349 apoplastic protease. *Plant Physiol.* **143**, 364-377.
- 1350 **Tomczynska, I., Stumpe, M., and Mauch, F.** (2018). A conserved RxLR effector interacts  
1351 with host RABA-type GTPases to inhibit vesicle-mediated secretion of antimicrobial  
1352 proteins. *The Plant Journal* **95**, 187-203.

- 1353 **Toruño, T.Y., Stergiopoulos, I., and Coaker, G.** (2016). Plant-pathogen effectors: cellular  
1354 probes interfering with plant defenses in spatial and temporal manners. *Annual review of*  
1355 *phytopathology* **54**, 419-441.
- 1356 **Toufexi, A., Duggan, C., Pandey, P., Savage, Z., Segretin, M.E., Yuen, L.H., Gaboriau,**  
1357 **D.C., Leary, A.Y., Khandare, V., Ward, A.D., Botchway, S.W., Bateman, B.C., Pan, I.,**  
1358 **Schattat, M., Sparkes, I., and Bozkurt, T.O.** (2019). Chloroplasts navigate towards the  
1359 pathogen interface to counteract infection by the Irish potato famine pathogen. *bioRxiv*,  
1360 516443.
- 1361 **Turnbull, D., Yang, L., Naqvi, S., Breen, S., Welsh, L., Stephens, J., Morris, J., Boevink,**  
1362 **P.C., Hedley, P.E., Zhan, J., Birch, P.R., and Gilroy, E.M.** (2017). RXLR effector AVR2  
1363 up-regulates a brassinosteroid-responsive bHLH transcription factor to suppress  
1364 immunity. *Plant Physiology* **174**, 356-369.
- 1365 **van Schie, C.C., and Takken, F.L.** (2014). Susceptibility genes 101: how to be a good host.  
1366 *Annual review of phytopathology* **52**, 551-581.
- 1367 **van West, P., de Jong, A.J., Judelson, H.S., Emons, A.M.C., and Govers, F.** (1998). The  
1368 *ipiO* Gene of *Phytophthora infestans* Is Highly Expressed in Invading Hyphae during  
1369 Infection. *Fungal Genet. Biol.* **23**, 126-138.
- 1370 **Vleeshouwers, V.G., Raffaele, S., Vossen, J.H., Champouret, N., Oliva, R., Segretin, M.E.,**  
1371 **Rietman, H., Cano, L.M., Lokossou, A., Kessel, G., Pel, M.A., and Kamoun, S.** (2011).  
1372 Understanding and exploiting late blight resistance in the age of effectors. *Annual review*  
1373 *of phytopathology* **49**, 507-531.
- 1374 **Vleeshouwers, V.G.A.A., Rietman, H., Krennek, P., Champouret, N., Young, C., Oh, S.-K.,**  
1375 **Wang, M., Bouwmeester, K., Vosman, B., Visser, R.G.F., Jacobsen, E., Govers, F.,**  
1376 **Kamoun, S., and Van der Vossen, E.A.G.** (2008). Effector Genomics Accelerates  
1377 Discovery and Functional Profiling of Potato Disease Resistance and *Phytophthora*  
1378 *infestans* Avirulence Genes. *PLOS ONE* **3**, e2875.
- 1379 **Voigt, B.** (2008). Actin cytoskeleton and endomembrane system dependent cell growth  
1380 (Universitäts-und Landesbibliothek Bonn).
- 1381 **Voigt, B., Timmers, A.C., Šamaj, J., Hlavacka, A., Ueda, T., Preuss, M., Nielsen, E.,**  
1382 **Mathur, J., Emans, N., Stenmark, H., Nakano, A., Baluška, F., and Menzel, D.** (2005).  
1383 Actin-based motility of endosomes is linked to the polar tip growth of root hairs. *Eur. J.*  
1384 *Cell Biol.* **84**, 609-621.
- 1385 **Vossen, J.H., Nijenhuis, M., Arens-De Reuver, M.J.B., Van Der Vossen, E.A.G.,**  
1386 **Jacobsen, E., and Visser, R.G.F.** (2011). Cloning and exploitation of a functional R-gene  
1387 from *Solanum chacoense*. US Patent Application No. WO2011034433A1.
- 1388 **Wang, S., McLellan, H., Bukharova, T., He, Q., Murphy, F., Shi, J., Sun, S., van Weymers,**  
1389 **P., Ren, Y., Thilliez, G., Wang, H., Chen, X., Engelhardt, S., Vleeshouwers, V., Gilroy,**  
1390 **E.M., Whisson, S.C., Hein, I., Wang, X., Tian, Z., Birch, P.R.J., and Boevink, P.C.**  
1391 (2018). *Phytophthora infestans* RXLR effectors act in concert at diverse subcellular  
1392 locations to enhance host colonization. *Journal of Experimental Botany* **70**, 343-356.
- 1393 **Wang, X., Boevink, P., McLellan, H., Armstrong, M., Bukharova, T., Qin, Z., and Birch,**  
1394 **P.R.** (2015). A host KH RNA-binding protein is a susceptibility factor targeted by an RXLR  
1395 effector to promote late blight disease. *Molecular plant* **8**, 1385-1395.
- 1396 **Wei, P., Wong, W.W., Park, J.S., Corcoran, E.E., Peisajovich, S.G., Onuffer, J.J., Weiss,**  
1397 **A., and Lim, W.A.** (2012). Bacterial virulence proteins as tools to rewire kinase pathways  
1398 in yeast and immune cells. *Nature* **488**, 384-388.
- 1399 **Weßling, R., Epple, P., Altmann, S., He, Y., Yang, L., Henz, S.R., McDonald, N., Wiley, K.,**  
1400 **Bader, K.C., and Gläßer, C.** (2014). Convergent targeting of a common host protein-  
1401 network by pathogen effectors from three kingdoms of life. *Cell host & microbe* **16**, 364-  
1402 375.
- 1403 **Whisson, S.C., Boevink, P.C., Moleleki, L., Avrova, A.O., Morales, J.G., Gilroy, E.M.,**  
1404 **Armstrong, M.R., Grouffaud, S., Van West, P., and Chapman, S.** (2007). A  
1405 translocation signal for delivery of oomycete effector proteins into host plant cells. *Nature*  
1406 **450**, 115-118.

- 1407 **Win, J., Kamoun, S., and Jones, A.M.** (2011). Purification of effector–target protein  
1408 complexes via transient expression in *Nicotiana benthamiana*. In *Plant Immunity*  
1409 (Springer), pp. 181-194.
- 1410 **Win, J., Krasileva, K.V., Kamoun, S., Shirasu, K., Staskawicz, B.J., and Banfield, M.J.**  
1411 (2012a). Sequence divergent RXLR effectors share a structural fold conserved across  
1412 plant pathogenic oomycete species. *PLoS Path.* **8**, e1002400.
- 1413 **Win, J., Chaparro-Garcia, A., Belhaj, K., Saunders, D., Yoshida, K., Dong, S., Schornack,**  
1414 **S., Zipfel, C., Robatzek, S., Hogenhout, S., and Kamoun, S.** (2012b). Effector Biology  
1415 of Plant-Associated Organisms: Concepts and Perspectives. *Cold Spring Harb. Symp.*  
1416 *Quant. Biol.*, pp. 235-247.
- 1417 **Yang, L., McLellan, H., Naqvi, S., He, Q., Boevink, P.C., Armstrong, M., Giuliani, L.M.,**  
1418 **Zhang, W., Tian, Z., and Zhan, J.** (2016). Potato NPH3/RPT2-like protein StNRL1,  
1419 targeted by a *Phytophthora infestans* RXLR effector, is a susceptibility factor. *Plant*  
1420 *physiology* **171**, 645-657.
- 1421 **Yoshida, K., Schuenemann, V.J., Cano, L.M., Pais, M., Mishra, B., Sharma, R., Lanz, C.,**  
1422 **Martin, F.N., Kamoun, S., Krause, J., Thines, M., Weigel, D., and Burbano, H.A.**  
1423 (2013). The rise and fall of the *Phytophthora infestans* lineage that triggered the Irish  
1424 potato famine. *Elife* **2**, e00731.
- 1425 **Yun, H.S., and Kwon, C.** (2017). Vesicle trafficking in plant immunity. *Curr Opin Plant Biol*  
1426 **40**, 34-42.
- 1427 **Zess, E.K., Jensen, C., Cruz-Mireles, N., De la Concepcion, J.C., Sklenar, J., Stephani,**  
1428 **M., Imre, R., Roitinger, E., Hughes, R., Belhaj, K., Mechtler, K., Menke, F.L.H.,**  
1429 **Bozkurt, T.O., Banfield, M.J., Kamoun, S., Maqbool, A., and Dagdas, Y.F.** (2019). N-  
1430 terminal  $\beta$ -strand underpins biochemical specialization of an ATG8 isoform. *PLoS Biol.*  
1431 **17**, e3000373.
- 1432 **Zheng, X., McLellan, H., Fraiture, M., Liu, X., Boevink, P.C., Gilroy, E.M., Chen, Y.,**  
1433 **Kandel, K., Sessa, G., Birch, P.R., and Brunner, F.** (2014). Functionally redundant  
1434 RXLR effectors from *Phytophthora infestans* act at different steps to suppress early flg22-  
1435 triggered immunity. *PLoS Pathog* **10**, e1004057.

1436
